# Supplementary material for: A four-country survey of public attitudes towards restricting healthcare costs by limiting the use of high-cost medical interventions
Source: PubMed Central journal article supplement — BMJ Open. 2012 May 14;2(3):e001087. doi: 10.1136/bmjopen-2012-001087 (PMC3358613; doi:10.1136/bmjopen-2012-001087), 2012-05-14
Supplement: bmjopen-2012-001087-s1.pdf [file bmjopen-2012-001087-s1.pdf]

To view the full contents of this document, you need a later version of the PDF viewer. You can upgrade to the latest version of Adobe Reader from [www.adobe.com/products/acrobat/readstep2.html](http://www.adobe.com/products/acrobat/readstep2.html)

For further support, go to [www.adobe.com/support/products/acrreader.html](http://www.adobe.com/support/products/acrreader.html)
