# Supplementary material for: A four-country survey of public attitudes towards restricting healthcare costs by limiting the use of high-cost medical interventions
Source: PubMed Central journal article supplement — BMJ Open. 2012 May 14;2(3):e001087. doi: 10.1136/bmjopen-2012-001087 (PMC3358613; doi:10.1136/bmjopen-2012-001087), 2012-05-14
Supplement: bmjopen-2012-001087.draft_revisions.pdf [file bmjopen-2012-001087.draft_revisions.pdf]

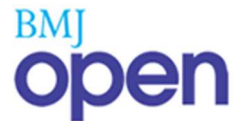

**Attitudes Toward Restricting Healthcare Costs by Limiting  
the Use of High-Cost Medical Interventions across Four  
Countries**

|                                 |                                                                                                                                                                                                                                                                                                                                                             |
|---------------------------------|-------------------------------------------------------------------------------------------------------------------------------------------------------------------------------------------------------------------------------------------------------------------------------------------------------------------------------------------------------------|
| Journal:                        | <i>BMJ Open</i>                                                                                                                                                                                                                                                                                                                                             |
| Manuscript ID:                  | bmjopen-2012-001087                                                                                                                                                                                                                                                                                                                                         |
| Article Type:                   | Research                                                                                                                                                                                                                                                                                                                                                    |
| Date Submitted by the Author:   | 09-Mar-2012                                                                                                                                                                                                                                                                                                                                                 |
| Complete List of Authors:       | Blendon, Robert; Harvard School of Public Health, Health Policy and Management<br>Benson, John; Harvard School of Public Health, Health Policy and Management<br>Botta, Michael; Harvard University, Program in Health Policy<br>Zeldow, Deborah; Alliance for Aging Research,<br>Kim, Minah; Harvard School of Public Health, Global Health and Population |
| <b>Primary Subject Heading</b>: | Health policy                                                                                                                                                                                                                                                                                                                                               |
| Secondary Subject Heading:      | Evidence based practice                                                                                                                                                                                                                                                                                                                                     |
| Keywords:                       | Health policy < HEALTH SERVICES ADMINISTRATION & MANAGEMENT, International health services < HEALTH SERVICES ADMINISTRATION & MANAGEMENT, Rationing < HEALTH SERVICES ADMINISTRATION & MANAGEMENT                                                                                                                                                           |
|                                 |                                                                                                                                                                                                                                                                                                                                                             |

SCHOLARONE™  
Manuscripts

only

1  
2  
3  
4  
5  
6  
7 **ATTITUDES TOWARD RESTRICTING HEALTHCARE COSTS BY LIMITING THE**  
8 **USE OF HIGH-COST MEDICAL INTERVENTIONS ACROSS FOUR COUNTRIES**  
9

10 Robert J Blendon, John M Benson, Michael D Botta, Deborah  
11 Zeldow, Minah Kang Kim  
12  
13

14  
15  
16 Robert J. Blendon, Sc.D., Professor of Health Policy and  
17 Political Analysis, Department of Health Policy and Management,  
18 Harvard School of Public Health, 677 Huntington Ave., 4<sup>th</sup> Floor,  
19 Boston, MA 02115, USA, phone +1 617-432-4502, fax +1 617-432-  
20 0092, [rblendon@hsph.harvard.edu](mailto:rblendon@hsph.harvard.edu)  
21  
22

23 John M. Benson, M.A., Research Scientist, Department of Health  
24 Policy and Management, Harvard School of Public Health, Boston,  
25 MA, USA, [jmbenson@hsph.harvard.edu](mailto:jmbenson@hsph.harvard.edu)  
26  
27

28 Michael D. Botta, A.B., Doctoral Candidate, Program in Health  
29 Policy, Harvard University, Cambridge, MA, USA,  
30 [mbotta@fas.harvard.edu](mailto:mbotta@fas.harvard.edu)  
31  
32

33 Deborah Zeldow, M.B.A., Executive Vice President, Alliance for  
34 Aging Research, 750 17<sup>th</sup> Street, N.W., Suite 1100, Washington,  
35 DC, 20005, USA, [DZeldow@agingresearch.org](mailto:DZeldow@agingresearch.org)  
36  
37

38 Minah Kang Kim, Ph.D., Takemi Fellow, Department of Global  
39 Health and Population, Harvard School of Public Health, Boston,  
40 MA, USA, and Associate Professor, Department of Public  
41 Administration, Ewha Womans University, Seoul, South Korea,  
42 [chathamkang@gmail.com](mailto:chathamkang@gmail.com)  
43  
44

45 Corresponding author: Robert J. Blendon,  
46 [rblendon@hsph.harvard.edu](mailto:rblendon@hsph.harvard.edu)  
47  
48

49 Keywords: Health policy, Evidence based practice. International  
50 health services, Rationing  
51  
52

53 Word count: 2288  
54  
55  
56  
57  
58  
59  
60

1  
2  
3  
4 **ATTITUDES TOWARD RESTRICTING HEALTHCARE COSTS BY LIMITING THE**  
5  
6 **USE OF HIGH-COST MEDICAL INTERVENTIONS ACROSS FOUR COUNTRIES**  
7  
8  
9  
10  
11  
12

13 **ABSTRACT**  
14

15  
16  
17  
18 **Objective.** To discern how the public in four countries, each  
19 with unique health systems and cultures, feels about efforts to  
20 restrain health care costs by limiting the use of high-cost  
21 prescription drugs and medical/surgical treatments.  
22  
23  
24  
25  
26  
27

28  
29  
30 **Design.** Cross-sectional survey.  
31  
32

33  
34  
35 **Setting.** Adult populations in Germany, Italy, the United  
36 Kingdom, and the United States.  
37  
38  
39

40  
41  
42 **Participants.** 2517 adults in the four countries. A questionnaire  
43 survey conducted by telephone (landline and cell) with randomly-  
44 selected adults in each of the four countries.  
45  
46  
47  
48

49  
50  
51 **Main outcome measures.** Support for different rationales for not  
52 providing/paying for high-cost prescription drugs/medical or  
53 surgical treatments, measured in the aggregate and using four  
54  
55  
56  
57  
58  
59  
60

1  
2  
3 case examples derived from actual decisions. Measures of public  
4 attitudes about specific policies involving comparative  
5 effectiveness and cost-benefit decision-making.  
6  
7  
8  
9

10  
11  
12 **Results.** The survey finds support among publics in four  
13 countries for decisions that limit the use of high-cost  
14 prescription drugs/treatments when some other drug/treatment is  
15 available that works equally well but costs less. The survey  
16 finds little public support, either in individual case examples  
17 or when asked in the aggregate, for decisions in which  
18 prescription drugs/treatments are denied on the basis of cost or  
19 various definitions of benefits. The main results are based on  
20 majorities of the public in each country supporting or opposing  
21 each measure.  
22  
23  
24  
25  
26  
27  
28  
29  
30  
31  
32  
33  
34  
35  
36  
37

38 **Conclusions.** The survey findings indicate that the public  
39 distinguishes in practice between the concepts of comparative  
40 effectiveness and cost-effectiveness analysis. This suggests  
41 that public authorities engaged in decision-making activities  
42 will find much more public support if they are dealing with the  
43 first type of decision than with the second.  
44  
45  
46  
47  
48  
49  
50  
51  
52  
53  
54  
55  
56  
57  
58  
59  
60

## ARTICLE SUMMARY

### Article focus

- Despite increasing concerns among government officials about high health care spending, a survey of the public in four countries finds little support for decisions that limit use of high-cost prescription drugs and treatments.
- The results provide insights for policy-makers, indicating that the public distinguishes in practice between the concepts of comparative effectiveness and cost-benefit analysis. They will generally support decisions related to the first, but not the second.

### Key Messages

- Government agencies dealing with cost-control issues should highlight those decisions not to pay for or provide the more expensive drug or treatment when two prescription drugs or treatments have the same outcome but one is more expensive than the other.
- Policy-makers need to be aware that when they discuss limiting the availability of high-cost prescription drugs or treatments based on the assessment of broader benefits, they may face considerable public controversy.

## Strengths and Limitations

- This is the only multi-country study of attitudes on this subject. It is unique in that it includes responses for four actual cases where governments made decisions about what should be paid for or provided.
- For general public respondents these are complex issues that may be difficult to understand, and some responses might differ if respondents were aware of other factors.

1  
2  
3  
4  
5  
6  
7  
8  
9  
10  
11  
12  
13 **ATTITUDES TOWARD RESTRICTING HEALTHCARE COSTS BY LIMITING THE**  
14 **USE OF HIGH-COST MEDICAL INTERVENTIONS ACROSS FOUR COUNTRIES**  
15  
16  
17  
18  
19  
20  
21

22 The rising cost of health care is seen as a serious concern  
23 in many industrialized countries. Increasingly, the focus by  
24 national governments for restraining these costs has been to  
25 have independent agencies assess whether the benefits of  
26 specific high-cost prescription drugs, diagnostic tests, and  
27 medical or surgical treatments justify their cost. If this is  
28 not seen to be the case, these agencies may recommend that  
29 payors or government health systems not pay for or provide these  
30 medical care interventions.  
31  
32  
33  
34  
35  
36  
37  
38  
39  
40  
41  
42

43 In Germany, the Institute for Quality and Efficiency in  
44 Healthcare (IQWiG - Institut für Qualität und Wirtschaftlichkeit  
45 im Gesundheitswesen) has been responsible for health technology  
46 assessments across a range of pharmaceuticals and therapeutics  
47 since 2004.<sup>1-3</sup> In Italy, the Italian Medicines Agency (AIFA -  
48 Agenzia Italiana del Farmaco) conducts health technology  
49 assessments, evaluating the clinical benefits of new products  
50  
51  
52  
53  
54  
55  
56  
57  
58  
59  
60

1  
2  
3 and, in conjunction with the Pricing and Reimbursement Committee  
4  
5 (CPR - Comitato Prezzi e Reimborso), judges cost effectiveness.<sup>4</sup>  
6  
7  
8 In the United Kingdom, the National Health Service has since  
9  
10 1999 relied on the National Institute for Clinical Excellence  
11  
12 (NICE) to generate cost effectiveness assessments and determine  
13  
14 whether new treatments offer enough value to justify adding  
15  
16 their costs to the health system.<sup>3,5</sup> In the United States, 2010  
17  
18 saw the advent of a new comparative effectiveness agency, the  
19  
20 Patient-Centered Outcomes Research Institute (PCORI). However,  
21  
22 the new U.S. agency was established with an explicit ban on the  
23  
24 use of any cost effectiveness analysis in payment or provision  
25  
26 decisions, in notable contrast to its more empowered European  
27  
28 counterparts.<sup>6,7</sup>  
29  
30  
31  
32

33  
34 As this approach to restraining health costs grows, the  
35  
36 question is raised about how accepting the public in these  
37  
38 various countries will be to these types of decisions. Health  
39  
40 care is a visible and popular issue. From one perspective, it  
41  
42 might be expected that the public would support these approaches  
43  
44 to containing costs and keeping health systems more affordable.  
45  
46 On the other hand, they may see these government- or insurance-  
47  
48 sponsored decisions as interfering in important individual  
49  
50 physician and patient choices, and thus oppose them. To date,  
51  
52 there has not been an assessment of public attitudes across  
53  
54 various countries on this question. A prior survey that looked  
55  
56  
57  
58  
59  
60



1  
2  
3 at part of this overall issue found that the U.S. public was  
4  
5 resistant to the use of comparative effectiveness research  
6  
7 results for patient care expenditure decisions. The public was  
8  
9 supportive of its use for general information, but not decision-  
10  
11 making purposes.<sup>8</sup> But European views might be expected to differ  
12  
13 from American attitudes because of the long history of more  
14  
15 government-directed health systems.  
16  
17

18  
19 In this article, we seek to provide an answer about public  
20  
21 acceptance of these types of decisions by looking at the  
22  
23 findings of a recent four-country survey. The data reported from  
24  
25 Germany, Italy, the U.K., and the U.S. offer results about  
26  
27 public attitudes toward these key questions. It also provides  
28  
29 the public response in each country to four case examples of  
30  
31 actual decisions in which the high cost of a medical  
32  
33 intervention was not thought by payors or governments to be  
34  
35 justified by its overall benefits.  
36  
37  
38  
39  
40  
41  
42

## 43 **METHODS**

44  
45 The data are derived from a four-country survey by the  
46  
47 Harvard School of Public Health and the Alliance for Aging  
48  
49 Research. Fieldwork was conducted via telephone (landline and  
50  
51 cell) with nationally representative random samples of adults  
52  
53 age 18 and older in four countries by SSRS/ICR, an independent  
54  
55 research company. Interview dates, sample sizes, and margins of  
56  
57  
58  
59  
60

error are shown below. The sample sizes are typical of public opinion surveys.

|         | <b>Interview<br/>Dates</b> | <b>Total<br/>interviews</b> | <b>Margin of<br/>error<br/>(percentage<br/>points)</b> |
|---------|----------------------------|-----------------------------|--------------------------------------------------------|
| Germany | June 30 - July<br>19, 2011 | 500                         | +/-5.4                                                 |
| Italy   | June 30 - July<br>19, 2011 | 500                         | +/-5.4                                                 |
| U.K.    | June 30 - July<br>19, 2011 | 500                         | +/-5.4                                                 |
| U.S.    | June 28 - July<br>24, 2011 | 1017                        | +/-3.9                                                 |

Nonresponse in telephone surveys produces some known biases in survey-derived estimates because participation tends to vary for different subgroups of the population. To compensate for these known biases, a post-stratification weighting design was used to weight all collected interviews to represent each country's adult population. Weighting targets included telephone status (landline, cell) and various individual demographics: race/ethnicity (U.S. only), age, gender, education, and region. Other techniques, such as callbacks staggered over times of days

1  
2  
3 and days of weeks and systematic respondent selection within  
4 households, are used to help ensure that the sample in each  
5 country is representative. After weighting, the sample for each  
6 country reflects the demographic composition of the adult  
7 population of that country.  
8  
9

10  
11  
12  
13  
14  
15 The results for each country are generalisable to the adult  
16 population of that country.  
17  
18

19  
20 The survey instrument comprised a range of questions  
21 relating to support for different rationales for not  
22 providing/paying for high-cost prescription drugs/medical or  
23 surgical treatments, measured in the aggregate and using four  
24 case examples derived from actual decisions, and attitudes about  
25 specific policies involving comparative effectiveness and cost-  
26 benefit decision-making. The question wordings are shown in more  
27 detail on the three tables.  
28  
29  
30  
31  
32  
33  
34  
35  
36  
37

38 The survey included four case examples, derived from  
39 comparative effectiveness decisions that had actually been made  
40 in one or another of the countries. Respondents were read a  
41 paragraph about the decision, without mention of the country  
42 where the decision was made or the name of the prescription drug  
43 or diagnostic test involved, and then asked whether they  
44 approved or disapproved of the decision. The content of the case  
45 examples, whose wordings appear in Table 2, were derived from  
46 journal or newspaper accounts, or the actual decision. The  
47  
48  
49  
50  
51  
52  
53  
54  
55  
56  
57  
58  
59  
60

1  
2  
3 drug/test, disease, and country for the four decisions were (1)  
4  
5 Avastin/bowel cancer/U.K.,<sup>9</sup> (2) Avastin/Lucentis/wet age-related  
6  
7 macular degeneration (wet AMD)/Italy,<sup>10</sup> (3) beta  
8  
9 interferon/multiple sclerosis/U.K.,<sup>11</sup> and (4) positron emission  
10  
11 tomography (PET scans)/head and neck tumors/Germany.<sup>12</sup>  
12  
13

14  
15 Many of the questions in the survey were asked of split  
16  
17 samples, where one half was asked about prescription drugs, the  
18  
19 other half about medical or surgical treatments. Because the  
20  
21 responses of the two half-samples were similar, the data for the  
22  
23 two forms were combined for clarity of presentation and to  
24  
25 increase statistical power. In the U.K. and Italy, questions  
26  
27 were asked about "the national health service providing..." In  
28  
29 Germany and the U.S., questions were asked about "the government  
30  
31 or health insurance plans paying for..."  
32  
33  
34  
35

36 Data analysis comprises descriptive statistics to ascertain  
37  
38 public attitudes on each of the measures. Percentages and  
39  
40 confidence intervals (at the 95% confidence level) are shown for  
41  
42 the responses to each survey item in each country. The base for  
43  
44 calculating percentages included all respondents who were asked  
45  
46 the question, so there are no missing data. "Don't know/Refused"  
47  
48 responses are included in the base, but are not shown in the  
49  
50 tables unless they are 10% or greater for the question in one or  
51  
52 more countries.  
53  
54  
55  
56  
57  
58  
59  
60

The Institutional Review Board at the Harvard School of Public Health ruled that this study is not human subjects research (Protocol #20104-101, December 16, 2010).

## RESULTS

Across the four countries, many people believe that high-cost drugs and treatments are already often being withheld. Majorities of the public in Germany (58%), Italy (55%), and the U.S. (67%) believe that in their country high-cost prescription drugs/medical or surgical treatments are very or somewhat often withheld from some people who might benefit from them in order to save money. This belief is not shared by a majority in the U.K., where 39% believe drugs/treatments are often withheld (Table 1).

Table 1. Public attitudes in four countries about comparative effectiveness decision-making and patient access (in percent)

|                                                                                                                                                                                                                               | Germany<br>n=500<br>% (CI 95%) | Italy<br>n=500<br>% (CI 95%) | U.K.<br>n=500<br>% (CI 95%) | U.S.<br>n=1017<br>% (CI 95%) |
|-------------------------------------------------------------------------------------------------------------------------------------------------------------------------------------------------------------------------------|--------------------------------|------------------------------|-----------------------------|------------------------------|
| In [your country] the (government or health insurance plans withhold/national health service withholds) high-cost (prescription drugs/medical or surgical treatments) from people who might benefit in order to save money... |                                |                              |                             |                              |
| Very often                                                                                                                                                                                                                    | 15 (11-19)                     | 19 (15-24)                   | 11 (7-14)                   | 29 (26-33)                   |
| Somewhat often                                                                                                                                                                                                                | 43 (38-48)                     | 36 (31-41)                   | 28 (23-33)                  | 38 (34-41)                   |
| Not too often                                                                                                                                                                                                                 | 30 (25-35)                     | 25 (20-29)                   | 39 (33-44)                  | 20 (17-23)                   |
| Not at all                                                                                                                                                                                                                    | 4 (2-7)                        | 9 (6-12)                     | 19 (15-23)                  | 7 (5-9)                      |
| Don't know/Refused                                                                                                                                                                                                            | 7 (4-10)                       | 11 (8-14)                    | 4 (1-6)                     | 6 (4-8)                      |
| Paying for/providing approved (prescription drugs/medical or surgical treatments) regardless of cost                                                                                                                          |                                |                              |                             |                              |

|                                                                                                                                                                                                                                                                                                                |            |            |            |            |
|----------------------------------------------------------------------------------------------------------------------------------------------------------------------------------------------------------------------------------------------------------------------------------------------------------------|------------|------------|------------|------------|
| (respondents were asked to choose between two statements:)                                                                                                                                                                                                                                                     |            |            |            |            |
| The (government or health insurance plans should pay for/national health service should provide) any (prescription drug/medical or surgical treatment) that has been approved as being safe and effective for saving lives or improving people's health, regardless of what it costs                           | 61 (56-66) | 77 (72-81) | 60 (55-65) | 59 (55-62) |
| There are so many new, expensive prescription drugs and medical or surgical treatments that it is too expensive for (government or health insurance plans to pay for/the national health service to provide) all of them                                                                                       | 35 (29-40) | 20 (16-24) | 38 (33-43) | 35 (31-39) |
| The (government or your health insurance plan paying for/national health service providing) a more expensive (prescription drug/medical or surgical treatment) recommended by your doctor even if it has not been shown to work better than less expensive (drugs/treatments)                                  |            |            |            |            |
| Favor paying for/providing (oppose comparative effectiveness)                                                                                                                                                                                                                                                  | 43 (37-48) | 21 (17-25) | 29 (24-34) | 33 (29-37) |
| Oppose paying for/providing (favor comparative effectiveness)                                                                                                                                                                                                                                                  | 49 (44-54) | 70 (65-75) | 69 (64-74) | 64 (61-68) |
| Some (prescription drugs/medical or surgical treatments) that have been shown to be safe and effective should not be (paid for by the government or health insurance plans/provided by the national health service) because their high cost is not felt to be justified by the amount of benefit they provide. |            |            |            |            |
| Favor not paying for/providing                                                                                                                                                                                                                                                                                 | 32 (27-37) | 31 (26-36) | 34 (28-39) | 31 (27-34) |
| Oppose not paying for/providing                                                                                                                                                                                                                                                                                | 59 (54-65) | 61 (56-66) | 63 (58-68) | 62 (59-66) |

Source: Harvard School of Public Health/Alliance for Aging Research Survey, 2011.

Note: "Don't know/Refused" responses not shown unless they are 10% or greater for the question in one or more countries.

Majorities in all four countries believe that any prescription drug/medical or surgical treatment that has been

1  
2  
3 approved as safe and effective for saving lives or improving  
4 people's health should be paid for or provided, regardless of  
5 cost. Paying for or providing these drugs/treatments is favored  
6 by about three-fourths of the public in Italy (77%) and about  
7 six in ten in Germany (61%), the U.K. (60%), and the U.S. (59%).  
8  
9

10  
11  
12  
13  
14 A majority in Italy (70%), the U.K. (69%), and the U.S.  
15 (64%) oppose the government, health insurance plans, or the  
16 national health service paying for or providing a prescription  
17 drug/medical or surgical treatment recommended by their doctor  
18 if it has not been shown to work better than less expensive  
19 ones. This view is shared by a plurality (49%) in Germany. This  
20 is often referred to as comparative effectiveness research.  
21  
22  
23  
24  
25  
26  
27  
28  
29

30  
31 However, the public does not support decisions in which  
32 prescription drugs/medical or surgical treatments are denied on  
33 the basis of cost or various definitions of benefits. The public  
34 was asked whether some prescription drugs/medical or surgical  
35 treatments that have been shown to be safe and effective should  
36 not be paid for or provided because of their high cost is not  
37 felt to be justified by the amount of benefit they provide.  
38  
39  
40  
41  
42  
43  
44  
45  
46  
47 About six in ten—59% in Germany, 61% in Italy, 63% in the U.K.,  
48 62% in the U.S.—were opposed.  
49  
50

51  
52  
53 When it comes to case examples of specific decisions  
54 involving cost and benefits that have been made, majorities in  
55 all four countries opposed three of the four decisions presented  
56  
57  
58  
59  
60

in the survey. In a fourth case example, a decision not to pay for or provide an imaging technology for diagnosing certain types of cancer, majorities in three of the countries were opposed, while a majority in Italy favored the decision (Table 2).

Table 2. Public attitudes in four countries about actual coverage decisions (in percent)

|                                                                                                                                                                                                                                                                                                                                                                                                                                                                                                                                                                                                                                           | Germany<br>n=250<br>% (CI 95%) | Italy<br>n=250<br>% (CI 95%) | U.K.<br>n=250<br>% (CI 95%) | U.S.<br>n=509<br>% (CI 95%) |
|-------------------------------------------------------------------------------------------------------------------------------------------------------------------------------------------------------------------------------------------------------------------------------------------------------------------------------------------------------------------------------------------------------------------------------------------------------------------------------------------------------------------------------------------------------------------------------------------------------------------------------------------|--------------------------------|------------------------------|-----------------------------|-----------------------------|
| In one country, the national government decided against (paying for/providing) a new drug for treating an advanced form of cancer. On average, the drug costs (\$35,000/£21,000/€25,000) per patient. The drug does not cure the disease, but studies suggest that using the drug can add, on average, about six months to a patient's life. Some patients would gain only a short period, while others could gain a lot more time.<br>If this decision not to (pay for/provide) this drug were made in [your country], would you approve or disapprove of the decision?                                                                  |                                |                              |                             |                             |
| Favor                                                                                                                                                                                                                                                                                                                                                                                                                                                                                                                                                                                                                                     | 36 (28-43)                     | 39 (32-47)                   | 24 (17-30)                  | 37 (32-43)                  |
| Oppose                                                                                                                                                                                                                                                                                                                                                                                                                                                                                                                                                                                                                                    | 60 (53-68)                     | 51 (44-59)                   | 76 (69-82)                  | 59 (54-65)                  |
| In one country, two drugs were available to treat a debilitating condition in the elderly. One of the drugs costs about 100 times as much as the other. The more expensive one has been tested and shown to be effective for people with this condition. The less expensive one has not been tested in research studies for treating this illness. However, many physicians who specialize in the condition use the lower-cost drug because they believe it is safe and effective for their patients. This is often referred to as using an off-label drug. The government in that country decided to (pay for/provide/pay) only the less |                                |                              |                             |                             |



|                                                                                                                                  |                                                                                                                                                                                                                                                                                                                                                                                                                                                                                                                                                                                                                                                                                                                                         |            |            |            |            |
|----------------------------------------------------------------------------------------------------------------------------------|-----------------------------------------------------------------------------------------------------------------------------------------------------------------------------------------------------------------------------------------------------------------------------------------------------------------------------------------------------------------------------------------------------------------------------------------------------------------------------------------------------------------------------------------------------------------------------------------------------------------------------------------------------------------------------------------------------------------------------------------|------------|------------|------------|------------|
| 1<br>2<br>3<br>4<br>5<br>6<br>7<br>8<br>9<br>10                                                                                  | expensive drug even though it had not been tested for this illness.-If this decision only to (pay for/provide) the less expensive drug that had not been tested for this illness were made in [your country], would you approve or disapprove of the decision?                                                                                                                                                                                                                                                                                                                                                                                                                                                                          |            |            |            |            |
| 11                                                                                                                               | Favor                                                                                                                                                                                                                                                                                                                                                                                                                                                                                                                                                                                                                                                                                                                                   | 24 (18-31) | 25 (18-31) | 20 (14-26) | 26 (21-31) |
| 12                                                                                                                               | Oppose                                                                                                                                                                                                                                                                                                                                                                                                                                                                                                                                                                                                                                                                                                                                  | 70 (63-78) | 71 (64-80) | 80 (74-86) | 71 (66-76) |
| 13<br>14<br>15<br>16<br>17<br>18<br>19<br>20<br>21<br>22<br>23<br>24<br>25<br>26<br>27<br>28<br>29<br>30<br>31<br>32<br>33       | A new drug is available for a serious, debilitating disease. It does not cure the disease, but it can provide relief for the symptoms of the disease. In one country, the national government decided to (pay for/provide) this drug only for a limited number of patients because of the drug's high cost of (\$15,000/£9,000/€11,000) a year. The drug is reserved for those patients who are most likely to see significant health benefits. Some people have objected to the decision because they argue that other patients might also benefit from the drug.-If this decision to (pay for/provide) this drug only for a limited number of patients were made in [your country], would you approve or disapprove of the decision?  |            |            |            |            |
| 34                                                                                                                               | Favor                                                                                                                                                                                                                                                                                                                                                                                                                                                                                                                                                                                                                                                                                                                                   | 28 (21-35) | 26 (20-32) | 27 (20-34) | 28 (22-33) |
| 35                                                                                                                               | Oppose                                                                                                                                                                                                                                                                                                                                                                                                                                                                                                                                                                                                                                                                                                                                  | 66 (58-73) | 71 (64-77) | 72 (65-79) | 69 (64-75) |
| 36<br>37<br>38<br>39<br>40<br>41<br>42<br>43<br>44<br>45<br>46<br>47<br>48<br>49<br>50<br>51<br>52<br>53<br>54<br>55<br>56<br>57 | In one country, the national government decided against (paying for/providing) the use of an imaging technology for diagnosing certain types of cancers. The technology is more expensive than alternative methods, costing over (\$2,000/£1,200/€1,400) per use. After conducting an evaluation, a government organization concluded that there was not enough scientific evidence to recommend using the technology for these other types of cancer. Other countries, however, actively use this technology for multiple types of cancer, because many doctors believe it provides the best, most detailed view of these other types of tumors. The evaluation organization argued that existing studies have not conclusively proven |            |            |            |            |

|                                                                                                                                                                                                                                                                                                   |            |            |            |            |
|---------------------------------------------------------------------------------------------------------------------------------------------------------------------------------------------------------------------------------------------------------------------------------------------------|------------|------------|------------|------------|
| that the technology has advantages over alternative methods and therefore should not be (paid for/provided). If this decision not to (pay for/provide) this technology to help diagnose these other types of cancer were made in [your country], would you approve or disapprove of the decision? |            |            |            |            |
| Favor                                                                                                                                                                                                                                                                                             | 26 (19-32) | 53 (46-60) | 18 (13-24) | 34 (28-39) |
| Oppose                                                                                                                                                                                                                                                                                            | 67 (60-75) | 39 (32-47) | 78 (71-84) | 63 (57-68) |

Source: Harvard School of Public Health/Alliance for Aging Research Survey, 2011.

Note: "Don't know/Refused" responses not shown.

The survey asked people whether they would favor or oppose their country having a government decision-making body that recommends whether government programs should pay for or provide prescription drugs/medical or surgical treatments if they think they cost too much. Public opinion in the four countries differs. Majorities in Germany (69%) and Italy (71%) favor having such an agency. A majority (54%) in the U.S. oppose having such an agency, while 43% favor having one. The public in the U.K. is about evenly divided, with 46% in favor, 48% opposed (Table 3).

Table 3. Public attitudes in four countries about government decision-making about costs of medical interventions (in percent)

|                                                                                                                                                                                                                                | Germany<br>n=500<br>% (CI 95%) | Italy<br>n=500<br>% (CI 95%) | U.K.<br>n=500<br>% (CI 95%) | U.S.<br>n=1017<br>% (CI 95%) |
|--------------------------------------------------------------------------------------------------------------------------------------------------------------------------------------------------------------------------------|--------------------------------|------------------------------|-----------------------------|------------------------------|
| Favor/oppose [your country] having a government decision-making body that recommends whether government programs should (pay for/provide) (prescription drugs/medical or surgical treatments) if they think they cost too much |                                |                              |                             |                              |

|                                                                                                                                                                              |            |            |            |            |
|------------------------------------------------------------------------------------------------------------------------------------------------------------------------------|------------|------------|------------|------------|
| Favor                                                                                                                                                                        | 71 (66-76) | 69 (64-74) | 46 (40-51) | 43 (39-47) |
| Oppose                                                                                                                                                                       | 21 (17-25) | 23 (18-27) | 48 (42-53) | 54 (50-58) |
| Such a government decision-making body would provide doctors with useful scientific information about what works best for patients with a given disease or medical condition |            |            |            |            |
| Yes                                                                                                                                                                          | 64 (59-69) | 87 (84-90) | 67 (62-73) | 55 (51-59) |
| No                                                                                                                                                                           | 27 (22-31) | 7 (5-9)    | 27 (23-32) | 40 (36-43) |
| Trust the national government to make the right health care decisions                                                                                                        |            |            |            |            |
| Trust                                                                                                                                                                        | 42 (37-47) | 54 (49-59) | 54 (49-59) | 34 (30-38) |
| Do not trust                                                                                                                                                                 | 53 (48-58) | 35 (30-40) | 39 (34-44) | 61 (57-65) |
| Don't know/Refused                                                                                                                                                           | 5 (3-7)    | 11 (8-14)  | 7 (4-10)   | 4 (3-5)    |

Source: Harvard School of Public Health/Alliance for Aging Research Survey, 2011.

Note: "Don't know/Refused" responses not shown unless they are 10% or greater for the question in one or more countries.

In spite of these differences in approval for a government decision-making body, majorities in all four countries believe that such an agency would provide doctors with useful scientific information about what works for patients with a given disease or medical condition.

With regard to governmental decision-making in health care, majorities in Italy and the U.K. say that they trust their national government to make the right health care decisions, while majorities in Germany and the U.S. say they do not.

## DISCUSSION

The survey findings indicate that the public distinguishes in practice between the concepts of comparative effectiveness and cost-benefit analysis. When two prescription drugs or

1  
2  
3 treatments have the same outcome but one is more expensive than  
4  
5 the other, the public supports policies that would not pay for  
6  
7 or provide the more expensive one in the absence of evidence  
8  
9 that it would work better than the less expensive alternative.  
10  
11

12 On the other hand, the survey found little public support,  
13  
14 either in individual case examples or when asked in the  
15  
16 aggregate, for the establishment of broader benefits as a  
17  
18 criterion for whether or not a drug or treatment should be paid  
19  
20 for or provided. If the evidence shows that a drug or treatment  
21  
22 benefits some patients for some period of time, the public is  
23  
24 reluctant to have these medical interventions not paid for or  
25  
26 provided.  
27  
28  
29

30  
31 Taken together, this suggests that across the four  
32  
33 countries public authorities engaged in decision-making  
34  
35 activities will find much more public support if they are  
36  
37 dealing with the first type of decision than with the second. In  
38  
39 addition, public officials may face public resistance for  
40  
41 decision-making about whether to pay for or provide high-cost  
42  
43 medical interventions, because a large proportion of the public  
44  
45 believes that some high-cost prescription drugs and treatments  
46  
47 are already being withheld.  
48  
49  
50

51  
52 This study has two main limitations. First, these types of  
53  
54 policy-making decisions may be difficult for the general public  
55  
56 to understand fully. Second, although respondents were told that  
57  
58  
59  
60

1  
2  
3 these types of decisions were being made as a way of limiting  
4  
5 future health care costs, they might have answered differently  
6  
7 had they been told that these decisions might lower their taxes  
8  
9 or health insurance premiums in the future, if that were the  
10  
11 case.  
12  
13

### 14 15 16 17 **Author Contributions**

18  
19 RJB and JMB made substantial contributions to the  
20  
21 conception and design of the study, as well as the analysis and  
22  
23 interpretation of the data, and drafted the article. MDB and MKK  
24  
25 made substantial contributions to the conception and design of  
26  
27 the study, the analysis and interpretation of the data, and the  
28  
29 critical revision of the article. DZ made substantial  
30  
31 contributions to the conception and design of the study, and to  
32  
33 the critical revision of the article. All authors gave final  
34  
35 approval of this version of the article. No one who fulfills the  
36  
37 criteria for authorship has been excluded as an author.  
38  
39  
40  
41  
42  
43  
44

### 45 **Competing Interests**

46  
47 All authors have completed the Unified Competing Interest  
48  
49 form at [http://www.icmje.org/coi\\_disclosure.pdf](http://www.icmje.org/coi_disclosure.pdf) (available on  
50  
51 request from the corresponding author). RJB, JMB, EMW, and KJW  
52  
53 acted as subcontractors under an Alliance for Aging Research  
54  
55 grant. DZ declares that the organisation by which she is  
56  
57  
58  
59  
60

1  
2  
3 employed, the Alliance for Aging Research, received a grant from  
4  
5 Bayer AG for this survey.  
6  
7  
8  
9

### 10 **Role of Funder**

11  
12 The survey was supported by a grant to the Alliance for  
13 Aging Research from Bayer AG. Bayer was not involved in the  
14 design of the survey, the data collection, the analysis or the  
15 interpretation of findings, or the preparation of the  
16 manuscript. The authors had full access to all data in the study  
17 and had full responsibility for the decision to submit for  
18 publication.  
19  
20  
21  
22  
23  
24  
25  
26  
27  
28  
29  
30

### 31 **Licence to Publish**

32  
33 The Corresponding Author has the right to grant on behalf  
34 of all authors and does grant on behalf of all authors, an  
35 exclusive licence (or non exclusive for government employees) on  
36 a worldwide basis to the BMJ Publishing Group Ltd and its  
37 Licensees to permit this article (if accepted) to be published  
38 in BMJ editions and any other BMJ PGL products and sublicences to  
39 exploit all subsidiary rights, as set out in our licence.  
40  
41  
42  
43  
44  
45  
46  
47  
48  
49  
50  
51

### 52 **Data sharing**

53  
54 The topline results of the survey are publicly available at  
55 <http://www.hsph.harvard.edu/news/press->  
56  
57  
58  
59  
60

1  
2  
3 [releases/files/blendon\\_topline\\_aging\\_12.11.pdf](#). Within six  
4  
5 months, the dataset will be made available at a public opinion  
6  
7 data archive.  
8  
9

## 10 11 12 **REFERENCES**

- 13  
14  
15  
16  
17 1. European Observatory on Health Care Systems. Health care  
18 systems in transition: Germany. 2000.  
19  
20 [http://www.euro.who.int/data/assets/pdf\\_file/0010/80776/E68952](http://www.euro.who.int/data/assets/pdf_file/0010/80776/E68952.pdf)  
21  
22 [.pdf](#) (accessed March 9, 2012).  
23  
24  
25  
26  
27  
28  
29 2. Jonsson B. IQWiG: an opportunity lost? *Eur J Health Econ*  
30 2008;9(3):205-207.  
31  
32  
33  
34  
35  
36 3. Chalkidou K, Tunis S, Lopert R, et al. Comparative  
37 effectiveness research and evidence-based health policy:  
38 experience from four countries. *Millbank Q* 2009;87(2):339-367.  
39  
40  
41  
42  
43  
44  
45 4. France G, Taroni F, Donatini A. The Italian health-care  
46 system. *Health Econ* 2005;14(Suppl 1):S187-202.  
47  
48  
49  
50  
51  
52 5. Macarthur D. Pharmaceutical pricing and reimbursement in the  
53 United Kingdom. *Health Economics in Prevention and Care*  
54 2000;1(1):47-50.  
55  
56  
57  
58  
59  
60

1  
2  
3  
4  
5  
6 6. Kamerow D. PCORI: odd name, important job, potential trouble.

7  
8 *BMJ* 2011;342:d2635. doi: 10.1136/bmj.d2635.  
9

10  
11  
12 7. Iglehart JK. The political fight over comparative  
13 effectiveness research. *Health Aff (Millwood)* 2010;29(10):1757-  
14  
15 1760.  
16  
17  
18

19  
20  
21 8. Gerber AS, Patashnik EM, Doherty D, et al. The public wants  
22 information, not board mandates, from comparative effectiveness  
23  
24 research. *Health Aff (Millwood)* 2010;29(10):1872-1881.  
25  
26  
27  
28

29  
30  
31 9. Smith R. Bowel cancer drug Avastin turned down by NICE. *The*  
32  
33 *Telegram*. August 24, 2010.  
34

35  
36 [http://www.telegraph.co.uk/health/healthnews/7959762/Bowel-  
39  
40 cancer-drug-Avastin-turned-down-by-Nice.html](http://www.telegraph.co.uk/health/healthnews/7959762/Bowel-<br/>37<br/>38 cancer-drug-Avastin-turned-down-by-Nice.html) (accessed March 9,  
41  
42 2012).  
43  
44

45 10. Pavlou F. Avastin to be reimbursed by Italian authorities.  
46  
47 *Ophthalmology Times Europe*. July 1, 2007.  
48

49  
50 [http://www.oteurope.com/ophthalmologytimeseurope/content/printCo  
51  
52  
53  
54  
55  
56  
57  
58  
59  
60](http://www.oteurope.com/ophthalmologytimeseurope/content/printContentPopup.jsp?id=476054) (accessed March 9, 2012).



1  
2  
3 11. Kernick D. Beta interferon, NICE, and rationing. *Br J Gen*  
4  
5 *Pract* 2002;52(482):784-785.  
6  
7

8  
9  
10 12. Institute for Quality and Efficiency in Health Care. Benefit  
11  
12 of positron emission tomography (PET) in patients with head and  
13  
14 neck tumors cannot be assessed. April 27, 2011.

15  
16 [https://www.iqwig.de/benefit-of-positron-emission-tomography-](https://www.iqwig.de/benefit-of-positron-emission-tomography-pet-in.1287.en.html)  
17  
18 [pet-in.1287.en.html](https://www.iqwig.de/benefit-of-positron-emission-tomography-pet-in.1287.en.html) (accessed March 9, 2012).  
19  
20  
21  
22  
23  
24  
25  
26  
27  
28  
29  
30  
31  
32  
33  
34  
35  
36  
37  
38  
39  
40  
41  
42  
43  
44  
45  
46  
47  
48  
49  
50  
51  
52  
53  
54  
55  
56  
57  
58  
59  
60

STROBE 2007 (v4) Statement—Checklist of items that should be included in reports of *cross-sectional studies*

| Section/Topic             | Item # | Recommendation                                                                                                                                                                       | Reported on page # |
|---------------------------|--------|--------------------------------------------------------------------------------------------------------------------------------------------------------------------------------------|--------------------|
| Title and abstract        | 1      | (a) Indicate the study’s design with a commonly used term in the title or the abstract                                                                                               | 1                  |
|                           |        | (b) Provide in the abstract an informative and balanced summary of what was done and what was found                                                                                  | 2-3                |
| <b>Introduction</b>       |        |                                                                                                                                                                                      |                    |
| Background/rationale      | 2      | Explain the scientific background and rationale for the investigation being reported                                                                                                 | 6-8                |
| Objectives                | 3      | State specific objectives, including any prespecified hypotheses                                                                                                                     | 8                  |
| <b>Methods</b>            |        |                                                                                                                                                                                      |                    |
| Study design              | 4      | Present key elements of study design early in the paper                                                                                                                              | 8-11               |
| Setting                   | 5      | Describe the setting, locations, and relevant dates, including periods of recruitment, exposure, follow-up, and data collection                                                      | 8-9                |
| Participants              | 6      | (a) Give the eligibility criteria, and the sources and methods of selection of participants                                                                                          | 8-9                |
| Variables                 | 7      | Clearly define all outcomes, exposures, predictors, potential confounders, and effect modifiers. Give diagnostic criteria, if applicable                                             | 10-11              |
| Data sources/ measurement | 8*     | For each variable of interest, give sources of data and details of methods of assessment (measurement). Describe comparability of assessment methods if there is more than one group | 8-9                |
| Bias                      | 9      | Describe any efforts to address potential sources of bias                                                                                                                            | 9-10               |
| Study size                | 10     | Explain how the study size was arrived at                                                                                                                                            | 9                  |
| Quantitative variables    | 11     | Explain how quantitative variables were handled in the analyses. If applicable, describe which groupings were chosen and why                                                         | 11                 |
| Statistical methods       | 12     | (a) Describe all statistical methods, including those used to control for confounding                                                                                                | 11                 |
|                           |        | (b) Describe any methods used to examine subgroups and interactions                                                                                                                  | Not applicable     |
|                           |        | (c) Explain how missing data were addressed                                                                                                                                          | 11                 |
|                           |        | (d) If applicable, describe analytical methods taking account of sampling strategy                                                                                                   | Not applicable     |
|                           |        | (e) Describe any sensitivity analyses                                                                                                                                                | Not applicable     |
| <b>Results</b>            |        |                                                                                                                                                                                      |                    |

1  
2  
3  
4  
5  
6  
7  
8  
9  
10  
11  
12  
13  
14  
15  
16  
17  
18  
19  
20  
21  
22  
23  
24  
25  
26  
27  
28  
29  
30  
31  
32  
33  
34  
35  
36  
37  
38  
39  
40  
41  
42  
43  
44  
45  
46  
47  
48  
49

|                          |     |                                                                                                                                                                                                              |                |
|--------------------------|-----|--------------------------------------------------------------------------------------------------------------------------------------------------------------------------------------------------------------|----------------|
| Participants             | 13* | (a) Report numbers of individuals at each stage of study—eg numbers potentially eligible, examined for eligibility, confirmed eligible, included in the study, completing follow-up, and analysed            | 9              |
|                          |     | (b) Give reasons for non-participation at each stage                                                                                                                                                         | 9              |
|                          |     | (c) Consider use of a flow diagram                                                                                                                                                                           | Not applicable |
| Descriptive data         | 14* | (a) Give characteristics of study participants (eg demographic, clinical, social) and information on exposures and potential confounders                                                                     | 10             |
|                          |     | (b) Indicate number of participants with missing data for each variable of interest                                                                                                                          | 11             |
| Outcome data             | 15* | Report numbers of outcome events or summary measures                                                                                                                                                         | 12-18          |
| Main results             | 16  | (a) Give unadjusted estimates and, if applicable, confounder-adjusted estimates and their precision (eg, 95% confidence interval). Make clear which confounders were adjusted for and why they were included | 12-18          |
|                          |     | (b) Report category boundaries when continuous variables were categorized                                                                                                                                    | Not applicable |
|                          |     | (c) If relevant, consider translating estimates of relative risk into absolute risk for a meaningful time period                                                                                             | Not applicable |
| Other analyses           | 17  | Report other analyses done—eg analyses of subgroups and interactions, and sensitivity analyses                                                                                                               | Not applicable |
| <b>Discussion</b>        |     |                                                                                                                                                                                                              |                |
| Key results              | 18  | Summarise key results with reference to study objectives                                                                                                                                                     | 18-20          |
| Limitations              | 19  | Discuss limitations of the study, taking into account sources of potential bias or imprecision. Discuss both direction and magnitude of any potential bias                                                   | 19-20          |
| Interpretation           | 20  | Give a cautious overall interpretation of results considering objectives, limitations, multiplicity of analyses, results from similar studies, and other relevant evidence                                   | 18-20          |
| Generalisability         | 21  | Discuss the generalisability (external validity) of the study results                                                                                                                                        | 10             |
| <b>Other information</b> |     |                                                                                                                                                                                                              |                |
| Funding                  | 22  | Give the source of funding and the role of the funders for the present study and, if applicable, for the original study on which the present article is based                                                | 21             |

\*Give information separately for cases and controls in case-control studies and, if applicable, for exposed and unexposed groups in cohort and cross-sectional studies.

**Note:** An Explanation and Elaboration article discusses each checklist item and gives methodological background and published examples of transparent reporting. The STROBE checklist is best used in conjunction with this article (freely available on the Web sites of PLoS Medicine at <http://www.plosmedicine.org/>, Annals of Internal Medicine at <http://www.annals.org/>, and Epidemiology at <http://www.epidem.com/>). Information on the STROBE Initiative is available at [www.strobe-statement.org](http://www.strobe-statement.org).

To view the full contents of this document, you need a later version of the PDF viewer. You can upgrade to the latest version of Adobe Reader from [www.adobe.com/products/acrobat/readstep2.html](http://www.adobe.com/products/acrobat/readstep2.html)

For further support, go to [www.adobe.com/support/products/acrreader.html](http://www.adobe.com/support/products/acrreader.html)

To view the full contents of this document, you need a later version of the PDF viewer. You can upgrade to the latest version of Adobe Reader from [www.adobe.com/products/acrobat/readstep2.html](http://www.adobe.com/products/acrobat/readstep2.html)

For further support, go to [www.adobe.com/support/products/acrreader.html](http://www.adobe.com/support/products/acrreader.html)

To view the full contents of this document, you need a later version of the PDF viewer. You can upgrade to the latest version of Adobe Reader from [www.adobe.com/products/acrobat/readstep2.html](http://www.adobe.com/products/acrobat/readstep2.html)

For further support, go to [www.adobe.com/support/products/acrreader.html](http://www.adobe.com/support/products/acrreader.html)

## ICMJE Form for Disclosure of Potential Conflicts of Interest

### Instructions

The purpose of this form is to provide readers of your manuscript with information about your other interests that could influence how they receive and understand your work. The form is designed to be completed electronically and stored electronically. It contains programming that allows appropriate data display. Each author should submit a separate form and is responsible for the accuracy and completeness of the submitted information. The form is in four parts.

#### 1. Identifying information.

Enter your full name. If you are NOT the corresponding author please check the box "no" and a space to enter the name of the corresponding author in the space that appears. Provide the requested manuscript information. Double-check the manuscript number and enter it.

#### 2. The work under consideration for publication.

This section asks for information about the work that you have submitted for publication. The time frame for this reporting is that of the work itself, from the initial conception and planning to the present. The requested information is about resources that you received, either directly or indirectly (via your institution), to enable you to complete the work. Checking "No" means that you did the work without receiving any financial support from any third party -- that is, the work was supported by funds from the same institution that pays your salary and that institution did not receive third-party funds with which to pay you. If you or your institution received funds from a third party to support the work, such as a government granting agency, charitable foundation or commercial sponsor, check "Yes". Then complete the appropriate boxes to indicate the type of support and whether the payment went to you, or to your institution, or both.

#### 3. Relevant financial activities outside the submitted work.

This section asks about your financial relationships with entities in the bio-medical arena that could be perceived to influence, or that give the appearance of potentially influencing, what you wrote in the submitted work. You should disclose interactions with ANY entity that could be considered broadly relevant to the work. For example, if your article is about testing an epidermal growth factor receptor (EGFR) antagonist in lung cancer, you should report all associations with entities pursuing diagnostic or therapeutic strategies in cancer in general, not just in the area of EGFR or lung cancer.

Report all sources of revenue paid (or promised to be paid) directly to you or your institution on your behalf over the 36 months prior to submission of the work. This should include all monies from sources with relevance to the submitted work, not just monies from the entity that sponsored the research. Please note that your interactions with the work's sponsor that are outside the submitted work should also be listed here. If there is any question, it is usually better to disclose a relationship than not to do so.

For grants you have received for work outside the submitted work, you should disclose support ONLY from entities that could be perceived to be affected financially by the published work, such as drug companies, or foundations supported by entities that could be perceived to have a financial stake in the outcome. Public funding sources, such as government agencies, charitable foundations or academic institutions, need not be disclosed. For example, if a government agency sponsored a study in which you have been involved and drugs were provided by a pharmaceutical company, you need only list the pharmaceutical company.

#### 4. Other relationships.

Use this section to report other relationships or activities that readers could perceive to have influenced, or that give the appearance of potentially influencing, what you wrote in the submitted work.





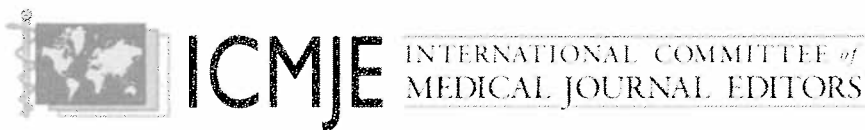

## ICMJE Form for Disclosure of Potential Conflicts of Interest

| The Work Under Consideration for Publication |                                     |                          |                            |                |            |                   |
|----------------------------------------------|-------------------------------------|--------------------------|----------------------------|----------------|------------|-------------------|
| Type                                         | No                                  | Money Paid to You        | Money to Your Institution* | Name of Entity | Comments** |                   |
| 7. Other                                     | <input checked="" type="checkbox"/> | <input type="checkbox"/> | <input type="checkbox"/>   |                |            | ADD<br>X<br>Add's |

\* This means money that your institution received for your efforts on this study.

\*\* Use this section to provide any needed explanation.

### Section 3. Relevant financial activities outside the submitted work.

Place a check in the appropriate boxes in the table to indicate whether you have financial relationships (regardless of amount of compensation) with entities as described in the instructions. Use one line for each entity; add as many lines as you need by clicking the "Add +" box. You should report relationships that were present during the 36 months prior to submission.

Complete each row by checking "No" or providing the requested information. If you have more than one relationship click the "Add" button to add a row. Excess rows can be removed by clicking the "X" button.

| Relevant financial activities outside the submitted work      |                                     |                          |                                     |        |          |          |
|---------------------------------------------------------------|-------------------------------------|--------------------------|-------------------------------------|--------|----------|----------|
| Type of Relationship (in alphabetical order)                  | No                                  | Money Paid to You        | Money to Your Institution*          | Entity | Comments |          |
| 1. Board membership                                           | <input checked="" type="checkbox"/> | <input type="checkbox"/> | <input type="checkbox"/>            |        |          | X<br>ADD |
| 2. Consultancy                                                | <input checked="" type="checkbox"/> | <input type="checkbox"/> | <input type="checkbox"/>            |        |          | X<br>ADD |
| 3. Employment                                                 | <input checked="" type="checkbox"/> | <input type="checkbox"/> | <input type="checkbox"/>            |        |          | X<br>ADD |
| 4. Expert testimony                                           | <input checked="" type="checkbox"/> | <input type="checkbox"/> | <input type="checkbox"/>            |        |          | X<br>ADD |
| 5. Grants/grants pending                                      | <input type="checkbox"/>            | <input type="checkbox"/> | <input checked="" type="checkbox"/> |        |          | X<br>ADD |
| 6. Payment for lectures including service on speakers bureaus | <input checked="" type="checkbox"/> | <input type="checkbox"/> | <input type="checkbox"/>            |        |          | X<br>ADD |
| 7. Payment for manuscript preparation                         | <input checked="" type="checkbox"/> | <input type="checkbox"/> | <input type="checkbox"/>            |        |          | X        |

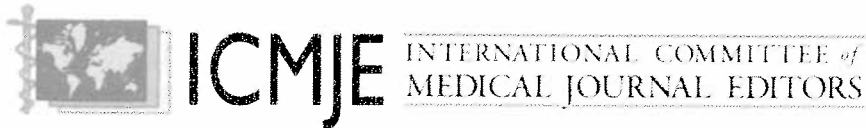

## ICMJE Form for Disclosure of Potential Conflicts of Interest

| Relevant financial activities outside the submitted work                    |                                     |                          |                            |        |          |     |
|-----------------------------------------------------------------------------|-------------------------------------|--------------------------|----------------------------|--------|----------|-----|
| Type of Relationship (in alphabetical order)                                | No                                  | Money Paid to You        | Money to Your Institution* | Entity | Comments |     |
| 8. Patents (planned, pending or issued)                                     | <input checked="" type="checkbox"/> | <input type="checkbox"/> | <input type="checkbox"/>   |        |          | ADD |
| 9. Royalties                                                                | <input checked="" type="checkbox"/> | <input type="checkbox"/> | <input type="checkbox"/>   |        |          | X   |
| 10. Payment for development of educational presentations                    | <input checked="" type="checkbox"/> | <input type="checkbox"/> | <input type="checkbox"/>   |        |          | ADD |
| 11. Stock/stock options                                                     | <input checked="" type="checkbox"/> | <input type="checkbox"/> | <input type="checkbox"/>   |        |          | X   |
| 12. Travel/accommodations/meeting expenses unrelated to activities listed** | <input checked="" type="checkbox"/> | <input type="checkbox"/> | <input type="checkbox"/>   |        |          | ADD |
| 13. Other (err on the side of full disclosure)                              | <input checked="" type="checkbox"/> | <input type="checkbox"/> | <input type="checkbox"/>   |        |          | X   |
|                                                                             |                                     |                          |                            |        |          | ADD |

\* This means money that your institution received for your efforts.  
 \*\* For example, if you report a consultancy above there is no need to report travel related to that consultancy on this line.

### Section 4. Other relationships

Are there other relationships or activities that readers could perceive to have influenced, or that give the appearance of potentially influencing, what you wrote in the submitted work?

- No other relationships/conditions/circumstances that present a potential conflict of interest
- Yes, the following relationships/conditions/circumstances are present (explain below):

At the time of manuscript acceptance, journals will ask authors to confirm and, if necessary, update their disclosure statements. On occasion, journals may ask authors to disclose further information about reported relationships.

Hide All Table Rows Checked 'No'      SAVE

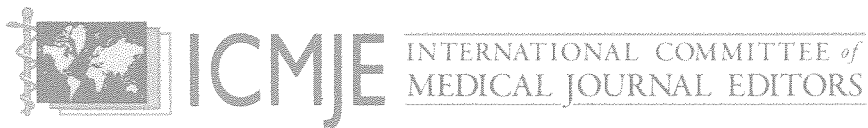

## ICMJE Form for Disclosure of Potential Conflicts of Interest

---

### Evaluation and Feedback

Please visit <http://www.icmje.org/cgi-bin/feedback> to provide feedback on your experience with completing this form.

To view the full contents of this document, you need a later version of the PDF viewer. You can upgrade to the latest version of Adobe Reader from [www.adobe.com/products/acrobat/readstep2.html](http://www.adobe.com/products/acrobat/readstep2.html)

For further support, go to [www.adobe.com/support/products/acrreader.html](http://www.adobe.com/support/products/acrreader.html)

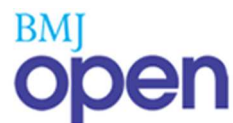

**A Four-Country Survey of Public Attitudes Toward Restricting Healthcare Costs by Limiting the Use of High-Cost Medical Interventions**

|                                 |                                                                                                                                                                                                                                                                                                                                                             |
|---------------------------------|-------------------------------------------------------------------------------------------------------------------------------------------------------------------------------------------------------------------------------------------------------------------------------------------------------------------------------------------------------------|
| Journal:                        | <i>BMJ Open</i>                                                                                                                                                                                                                                                                                                                                             |
| Manuscript ID:                  | bmjopen-2012-001087.R1                                                                                                                                                                                                                                                                                                                                      |
| Article Type:                   | Research                                                                                                                                                                                                                                                                                                                                                    |
| Date Submitted by the Author:   | 02-Apr-2012                                                                                                                                                                                                                                                                                                                                                 |
| Complete List of Authors:       | Blendon, Robert; Harvard School of Public Health, Health Policy and Management<br>Benson, John; Harvard School of Public Health, Health Policy and Management<br>Botta, Michael; Harvard University, Program in Health Policy<br>Zeldow, Deborah; Alliance for Aging Research,<br>Kim, Minah; Harvard School of Public Health, Global Health and Population |
| <b>Primary Subject Heading</b>: | Health policy                                                                                                                                                                                                                                                                                                                                               |
| Secondary Subject Heading:      | Evidence based practice, Health economics, Qualitative research, Pharmacology and therapeutics                                                                                                                                                                                                                                                              |
| Keywords:                       | Health policy < HEALTH SERVICES ADMINISTRATION & MANAGEMENT, International health services < HEALTH SERVICES ADMINISTRATION & MANAGEMENT, Rationing < HEALTH SERVICES ADMINISTRATION & MANAGEMENT                                                                                                                                                           |
|                                 |                                                                                                                                                                                                                                                                                                                                                             |

SCHOLARONE™  
Manuscripts

1  
2  
3  
4  
5  
6  
7  
8  
9  
10  
11 | **A FOUR-COUNTRY SURVEY OF PUBLIC ATTITUDES TOWARD RESTRICTING**  
12 **HEALTHCARE COSTS BY LIMITING THE USE OF HIGH-COST MEDICAL**  
13 **INTERVENTIONS ~~ACROSS FOUR COUNTRIES~~**  
14 |

15 Robert J Blendon, John M Benson, Michael D Botta, Deborah  
16 Zeldow, Minah Kang Kim  
17  
18  
19

20 Robert J. Blendon, Sc.D., Professor of Health Policy and  
21 Political Analysis, Department of Health Policy and Management,  
22 Harvard School of Public Health, 677 Huntington Ave., 4<sup>th</sup> Floor,  
23 Boston, MA 02115, USA, phone +1 617-432-4502, fax +1 617-432-  
24 0092, [rblendon@hsph.harvard.edu](mailto:rblendon@hsph.harvard.edu)

25 John M. Benson, M.A., Research Scientist, Department of Health  
26 Policy and Management, Harvard School of Public Health, Boston,  
27 MA, USA, [jmbenson@hsph.harvard.edu](mailto:jmbenson@hsph.harvard.edu)  
28

29 Michael D. Botta, A.B., Doctoral Candidate, Program in Health  
30 Policy, Harvard University, Cambridge, MA, USA,  
31 [mbotta@fas.harvard.edu](mailto:mbotta@fas.harvard.edu)  
32

33 Deborah Zeldow, M.B.A., Executive Vice President, Alliance for  
34 Aging Research, 750 17<sup>th</sup> Street, N.W., Suite 1100, Washington,  
35 DC, 20005, USA, [DZeldow@agingresearch.org](mailto:DZeldow@agingresearch.org)  
36

37 Minah Kang Kim, Ph.D., Takemi Fellow, Department of Global  
38 Health and Population, Harvard School of Public Health, Boston,  
39 MA, USA, and Associate Professor, Department of Public  
40 Administration, Ewha Womans University, Seoul, South Korea,  
41 [chathamkang@gmail.com](mailto:chathamkang@gmail.com)  
42

43 Corresponding author: Robert J. Blendon,  
44 [rblendon@hsph.harvard.edu](mailto:rblendon@hsph.harvard.edu)

45 Keywords: Health policy, Evidence based practice. International  
46 health services, Rationing  
47

48 | Word count: ~~23562288~~  
49  
50  
51  
52  
53  
54  
55  
56  
57  
58  
59  
60

1  
2  
3  
4  
5  
6  
7  
8  
9  
10 A FOUR-COUNTRY SURVEY OF PUBLIC ATTITUDES TOWARD RESTRICTING  
11 HEALTHCARE COSTS BY LIMITING THE USE OF HIGH-COST MEDICAL  
12 INTERVENTIONS ~~ACROSS FOUR COUNTRIES~~  
13  
14  
15  
16  
17  
18

19 **ABSTRACT**

20  
21  
22  
23 **Objective.** To discern how the public in four countries, each  
24 with unique health systems and cultures, feels about efforts to  
25 restrain health care costs by limiting the use of high-cost  
26 prescription drugs and medical/surgical treatments.  
27  
28  
29

30  
31  
32 **Design.** Cross-sectional survey.  
33  
34

35  
36 **Setting.** Adult populations in Germany, Italy, the United  
37 Kingdom, and the United States.  
38  
39

40  
41 **Participants.** 2517 adults in the four countries. A questionnaire  
42 survey conducted by telephone (landline and cell) with randomly-  
43 selected adults in each of the four countries.  
44  
45  
46  
47

48  
49 **Main outcome measures.** Support for different rationales for not  
50 providing/paying for high-cost prescription drugs/medical or  
51  
52

1  
2  
3  
4  
5  
6  
7  
8  
9 surgical treatments, measured in the aggregate and using four  
10 case examples derived from actual decisions. Measures of public  
11 attitudes about specific policies involving comparative  
12 effectiveness and cost-benefit decision-making.  
13  
14  
15

16  
17  
18 **Results.** The survey finds support among publics in four  
19 countries for decisions that limit the use of high-cost  
20 prescription drugs/treatments when some other drug/treatment is  
21 available that works equally well but costs less. The survey  
22 finds little public support, either in individual case examples  
23 or when asked in the aggregate, for decisions in which  
24 prescription drugs/treatments are denied on the basis of cost or  
25 various definitions of benefits. The main results are based on  
26 majorities of the public in each country supporting or opposing  
27 each measure.  
28  
29  
30  
31  
32  
33  
34  
35  
36  
37

38 **Conclusions.** The survey findings indicate that the public  
39 distinguishes in practice between the concepts of comparative  
40 effectiveness and cost-effectiveness analysis. This suggests  
41 that public authorities engaged in decision-making activities  
42 will find much more public support if they are dealing with the  
43 first type of decision than with the second.  
44  
45  
46  
47  
48  
49  
50  
51  
52  
53  
54



## ARTICLE SUMMARY

### Article focus

- Despite increasing concerns among government officials about high health care spending, a survey of the public in four countries finds little support for decisions that limit use of high-cost prescription drugs and treatments.
- The results provide insights for policy-makers, indicating that the public distinguishes in practice between the concepts of comparative effectiveness and cost-benefit analysis. They will generally support decisions related to the first, but not the second.

### Key Messages

- Government agencies dealing with cost-control issues should highlight those decisions not to pay for or provide the more expensive drug or treatment when two prescription drugs or treatments have the same outcome but one is more expensive than the other.
- Policy-makers need to be aware that when they discuss limiting the availability of high-cost prescription drugs or treatments based on the assessment of broader benefits, they may face considerable public controversy.

### Strengths and Limitations

- This is the only multi-country study of attitudes on this subject. It is unique in that it includes responses for four actual cases where governments made decisions about what should be paid for or provided.
- For general public respondents these are complex issues that may be difficult to understand, and some responses might differ if respondents were aware of other factors.

1  
2  
3  
4  
5  
6  
7  
8  
9  
10  
11  
12  
13  
14  
15  
16  
17 **A FOUR-COUNTRY SURVEY OF PUBLIC ATTITUDES TOWARD RESTRICTING**  
18 **HEALTHCARE COSTS BY LIMITING THE USE OF HIGH-COST MEDICAL**  
19 **INTERVENTIONS ~~ACROSS FOUR COUNTRIES~~**  
20  
21  
22  
23  
24  
25

26 The rising cost of health care is seen as a serious concern  
27 in many industrialized countries. Increasingly, the focus by  
28 national governments for restraining these costs has been to  
29 have independent agencies assess whether the benefits of  
30 specific high-cost prescription drugs, diagnostic tests, and  
31 medical or surgical treatments justify their cost. If this is  
32 not seen to be the case, these agencies may recommend that  
33 payors or government health systems not pay for or provide these  
34 medical care interventions.  
35  
36  
37  
38  
39  
40  
41

42 In Germany, the Institute for Quality and Efficiency in  
43 Healthcare (IQWiG - Institut für Qualität und Wirtschaftlichkeit  
44 im Gesundheitswesen) has been responsible for health technology  
45 assessments across a range of pharmaceuticals and therapeutics  
46 since 2004.<sup>1-3</sup> In Italy, the Italian Medicines Agency (AIFA -  
47 Agenzia Italiana del Farmaco) conducts health technology  
48  
49  
50  
51  
52  
53

1  
2  
3  
4  
5  
6  
7  
8  
9 assessments, evaluating the clinical benefits of new products  
10 and, in conjunction with the Pricing and Reimbursement Committee  
11 (CPR - Comitato Prezzi e Reimborso), judges cost effectiveness.<sup>4</sup>  
12  
13 In the United Kingdom, the National Health Service has since  
14 1999 relied on the National Institute for Clinical Excellence  
15 (NICE) to generate cost effectiveness assessments and determine  
16 whether new treatments offer enough value to justify adding  
17 their costs to the health system.<sup>3,5</sup> In the United States, 2010  
18 saw the advent of a new comparative effectiveness agency, the  
19 Patient-Centered Outcomes Research Institute (PCORI). However,  
20 the new U.S. agency was established with an explicit ban on the  
21 use of any cost effectiveness analysis in payment or provision  
22 decisions, in notable contrast to its more empowered European  
23 counterparts.<sup>6,7</sup>  
24  
25  
26  
27  
28  
29  
30  
31  
32  
33  
34

35 As this approach to restraining health costs grows, the  
36 question is raised about how accepting the public in these  
37 various countries will be to these types of decisions. Health  
38 care is a visible and popular issue. From one perspective, it  
39 might be expected that the public would support these approaches  
40 to containing costs and keeping health systems more affordable.  
41 On the other hand, they may see these government- or insurance-  
42 sponsored decisions as interfering in important individual  
43 physician and patient choices, and thus oppose them.  
44  
45  
46  
47  
48  
49  
50  
51  
52  
53  
54  
55  
56  
57  
58  
59  
60

1  
2  
3  
4  
5  
6  
7  
8  
9 To date, there has not been an assessment of public  
10 attitudes across various countries on this question. A prior  
11 survey that looked at part of this overall issue found that the  
12 U.S. public was resistant to the use of comparative  
13 effectiveness research results for patient care expenditure  
14 decisions. The public was supportive of its use for general  
15 information, but not decision-making purposes.<sup>8</sup> An earlier study  
16 found that a majority of the German public favored government  
17 not limiting spending for health services, opposed limiting  
18 benefits to a core of essential benefits, and thought treatment  
19 decisions should be made by doctors.<sup>9</sup> A study in Italy found that  
20 when given a single case example, there was considerable public  
21 resistance to rationing or prior-setting.<sup>10</sup> In a recent study  
22 aimed at examining the German public's attitudes toward proposed  
23 criteria for prioritizing health services, little evidence of  
24 support was found for using age as a criterion.<sup>11</sup> ~~But European~~  
25 ~~views might be expected to differ from American attitudes~~  
26 ~~because of the long history of more government directed health~~  
27 ~~systems.~~

28  
29  
30  
31  
32  
33  
34  
35  
36  
37  
38  
39  
40  
41  
42  
43  
44 In this article, we seek to provide an answer about public  
45 acceptance of these types of decisions by looking at the  
46 findings of a recent four-country survey. The data reported from  
47 Germany, Italy, the U.K., and the U.S. offer results about  
48 public attitudes toward these key questions. It also provides

Formatted: Indent: First line: 0.5"

Formatted: Superscript

Formatted: Superscript

Formatted: Superscript

1  
2  
3  
4  
5  
6  
7  
8  
9 the public response in each country to four case examples of  
10 actual decisions in which the high cost of a medical  
11 intervention was not thought by payors or governments to be  
12 justified by its overall benefits.  
13  
14  
15  
16  
17

## 18 METHODS

19  
20 The data are derived from a four-country survey by the  
21 Harvard School of Public Health and the Alliance for Aging  
22 Research. Fieldwork was conducted via telephone (landline and  
23 cell) with nationally representative random samples of adults  
24 age 18 and older in four countries by SSRS/ICR, an independent  
25 research company. Interview dates, sample sizes, and margins of  
26 error are shown below. The sample sizes are typical of public  
27 opinion surveys.  
28  
29  
30  
31  
32  
33  
34  
35  
36

|         | <b>Interview<br/>Dates</b> | <b>Total<br/>interviews</b> | <b>Margin of<br/>error<br/>(percentage<br/>points)</b> |
|---------|----------------------------|-----------------------------|--------------------------------------------------------|
| Germany | June 30 - July<br>19, 2011 | 500                         | +/-5.4                                                 |
| Italy   | June 30 - July<br>19, 2011 | 500                         | +/-5.4                                                 |
| U.K.    | June 30 - July             | 500                         | +/-5.4                                                 |

|      |                            |      |        |
|------|----------------------------|------|--------|
|      | 19, 2011                   |      |        |
| U.S. | June 28 - July<br>24, 2011 | 1017 | +/-3.9 |

Nonresponse in telephone surveys produces some known biases in survey-derived estimates because participation tends to vary for different subgroups of the population. To compensate for these known biases, a post-stratification weighting design was used to weight all collected interviews to represent each country's adult population. Weighting targets included telephone status (landline, cell) and various individual demographics: race/ethnicity (U.S. only), age, gender, education, and region. Other techniques, such as callbacks staggered over times of days and days of weeks and systematic respondent selection within households, are used to help ensure that the sample in each country is representative.

After weighting, the sample for each country reflects the demographic composition of the adult population of that country. The results for each country are generalisable to the adult population of that country.

The survey instrument comprised a range of questions relating to support for different rationales for not providing/paying for high-cost prescription drugs/medical or surgical treatments, measured in the aggregate and using four

Formatted: Indent: First line: 0.5"

Formatted: Indent: First line: 0"

1  
2  
3  
4  
5  
6  
7  
8  
9  
10  
11  
12  
13  
14  
15  
16  
17  
18  
19  
20  
21  
22  
23  
24  
25  
26  
27  
28  
29  
30  
31  
32  
33  
34  
35  
36  
37  
38  
39  
40  
41  
42  
43  
44  
45  
46  
47  
48  
49  
50  
51  
52  
53  
54  
55  
56  
57  
58  
59  
60

case examples derived from actual decisions, and attitudes about specific policies involving comparative effectiveness and cost-benefit decision-making. The question wordings are shown in more detail on the three tables.

The survey included four case examples, derived from comparative effectiveness decisions that had actually been made in one or another of the countries. Respondents were read a paragraph about the decision, without mention of the country where the decision was made or the name of the prescription drug or diagnostic test involved, and then asked whether they approved or disapproved of the decision. The content of the case examples, whose wordings appear in Table 2, were derived from journal or newspaper accounts, or the actual decision. The drug/test, disease, and country for the four decisions were (1) Avastin/bowel cancer/U.K.,<sup>129</sup> (2) Avastin/Lucentis/wet age-related macular degeneration (wet AMD)/Italy,<sup>130</sup> (3) beta interferon/multiple sclerosis/U.K.,<sup>141</sup> and (4) positron emission tomography (PET scans)/head and neck tumors/Germany.<sup>152</sup>

Many of the questions in the survey were asked of split samples, where one half was asked about prescription drugs, the other half about medical or surgical treatments. Because the responses of the two half-samples were similar, the data for the two forms were combined for clarity of presentation and to increase statistical power. In the U.K. and Italy, questions



1  
2  
3  
4  
5  
6  
7  
8  
9 were asked about “the national health service providing...” In  
10 Germany and the U.S., questions were asked about “the government  
11 or health insurance plans paying for...”  
12

13  
14 Data analysis comprises descriptive statistics to ascertain  
15 public attitudes on each of the measures. Percentages and  
16 confidence intervals (at the 95% confidence level) are shown for  
17 the responses to each survey item in each country. The base for  
18 calculating percentages included all respondents who were asked  
19 the question, so there are no missing data. “Don’t know/Refused”  
20 responses are included in the base, but are not shown in the  
21 tables unless they are 10% or greater for the question in one or  
22 more countries.  
23  
24  
25  
26  
27  
28  
29  
30  
31  
32

33 The Institutional Review Board at the Harvard School of  
34 Public Health ruled that this study is not human subjects  
35 research (Protocol #20104-101, December 16, 2010).  
36  
37  
38  
39

#### 40 **RESULTS**

41  
42 Across the four countries, many people believe that high-  
43 cost drugs and treatments are already often being withheld.  
44 Majorities of the public in Germany (58%), Italy (55%), and the  
45 U.S. (67%) believe that in their country high-cost prescription  
46 drugs/medical or surgical treatments are very or somewhat often  
47 withheld from some people who might benefit from them in order  
48  
49  
50  
51  
52

to save money. This belief is not shared by a majority in the U.K., where 39% believe drugs/treatments are often withheld (Table 1).

Table 1. Public attitudes in four countries about comparative effectiveness decision-making and patient access (in percent)

|                                                                                                                                                                                                                                                                                      | Germany<br>n=500<br>% (CI 95%) | Italy<br>n=500<br>% (CI 95%) | U.K.<br>n=500<br>% (CI 95%) | U.S.<br>n=1017<br>% (CI 95%) |
|--------------------------------------------------------------------------------------------------------------------------------------------------------------------------------------------------------------------------------------------------------------------------------------|--------------------------------|------------------------------|-----------------------------|------------------------------|
| In [your country] the (government or health insurance plans withhold/national health service withholds) high-cost (prescription drugs/medical or surgical treatments) from people who might benefit in order to save money...                                                        |                                |                              |                             |                              |
| Very often                                                                                                                                                                                                                                                                           | 15 (11-19)                     | 19 (15-24)                   | 11 (7-14)                   | 29 (26-33)                   |
| Somewhat often                                                                                                                                                                                                                                                                       | 43 (38-48)                     | 36 (31-41)                   | 28 (23-33)                  | 38 (34-41)                   |
| Not too often                                                                                                                                                                                                                                                                        | 30 (25-35)                     | 25 (20-29)                   | 39 (33-44)                  | 20 (17-23)                   |
| Not at all                                                                                                                                                                                                                                                                           | 4 (2-7)                        | 9 (6-12)                     | 19 (15-23)                  | 7 (5-9)                      |
| Don't know/Refused                                                                                                                                                                                                                                                                   | 7 (4-10)                       | 11 (8-14)                    | 4 (1-6)                     | 6 (4-8)                      |
| Paying for/providing approved (prescription drugs/medical or surgical treatments) regardless of cost (respondents were asked to choose between two statements:)                                                                                                                      |                                |                              |                             |                              |
| The (government or health insurance plans should pay for/national health service should provide) any (prescription drug/medical or surgical treatment) that has been approved as being safe and effective for saving lives or improving people's health, regardless of what it costs | 61 (56-66)                     | 77 (72-81)                   | 60 (55-65)                  | 59 (55-62)                   |
| There are so many new, expensive prescription drugs and medical or surgical treatments that it is too expensive for (government or health insurance plans to pay for/the national health service to provide) all of them                                                             | 35 (29-40)                     | 20 (16-24)                   | 38 (33-43)                  | 35 (31-39)                   |
| The (government or your health insurance plan paying for/national health service providing) a more expensive (prescription drug/medical or surgical treatment) recommended by your doctor even if it has not been                                                                    |                                |                              |                             |                              |

|                                                                                                                                                                                                                                                                                                                |            |            |            |            |
|----------------------------------------------------------------------------------------------------------------------------------------------------------------------------------------------------------------------------------------------------------------------------------------------------------------|------------|------------|------------|------------|
| shown to work better than less expensive (drugs/treatments)                                                                                                                                                                                                                                                    |            |            |            |            |
| Favor paying for/providing (oppose comparative effectiveness)                                                                                                                                                                                                                                                  | 43 (37-48) | 21 (17-25) | 29 (24-34) | 33 (29-37) |
| Oppose paying for/providing (favor comparative effectiveness)                                                                                                                                                                                                                                                  | 49 (44-54) | 70 (65-75) | 69 (64-74) | 64 (61-68) |
| Some (prescription drugs/medical or surgical treatments) that have been shown to be safe and effective should not be (paid for by the government or health insurance plans/provided by the national health service) because their high cost is not felt to be justified by the amount of benefit they provide. |            |            |            |            |
| Favor not paying for/providing                                                                                                                                                                                                                                                                                 | 32 (27-37) | 31 (26-36) | 34 (28-39) | 31 (27-34) |
| Oppose not paying for/providing                                                                                                                                                                                                                                                                                | 59 (54-65) | 61 (56-66) | 63 (58-68) | 62 (59-66) |

Source: Harvard School of Public Health/Alliance for Aging Research Survey, 2011.

Note: "Don't know/Refused" responses not shown unless they are 10% or greater for the question in one or more countries.

Majorities in all four countries believe that any prescription drug/medical or surgical treatment that has been approved as safe and effective for saving lives or improving people's health should be paid for or provided, regardless of cost. Paying for or providing these drugs/treatments is favored by about three-fourths of the public in Italy (77%) and about six in ten in Germany (61%), the U.K. (60%), and the U.S. (59%).

A majority in Italy (70%), the U.K. (69%), and the U.S. (64%) oppose the government, health insurance plans, or the national health service paying for or providing a prescription drug/medical or surgical treatment recommended by their doctor if it has not been shown to work better than less expensive

ones. This view is shared by a plurality (49%) in Germany. This is often referred to as comparative effectiveness research.

However, the public does not support decisions in which prescription drugs/medical or surgical treatments are denied on the basis of cost or various definitions of benefits. The public was asked whether some prescription drugs/medical or surgical treatments that have been shown to be safe and effective should not be paid for or provided because of their high cost is not felt to be justified by the amount of benefit they provide.

About six in ten—59% in Germany, 61% in Italy, 63% in the U.K., 62% in the U.S.—were opposed.

When it comes to case examples of specific decisions involving cost and benefits that have been made, majorities in all four countries opposed three of the four decisions presented in the survey. In a fourth case example, a decision not to pay for or provide an imaging technology for diagnosing certain types of cancer, majorities in three of the countries were opposed, while a majority in Italy favored the decision (Table 2).

Table 2. Public attitudes in four countries about actual coverage decisions (in percent)

|                                                                                                                                                               | Germany<br>n=250<br>% (CI 95%) | Italy<br>n=250<br>% (CI 95%) | U.K.<br>n=250<br>% (CI 95%) | U.S.<br>n=509<br>% (CI 95%) |
|---------------------------------------------------------------------------------------------------------------------------------------------------------------|--------------------------------|------------------------------|-----------------------------|-----------------------------|
| In one country, the national government decided against (paying for/providing) a new drug for treating an advanced form of cancer. On average, the drug costs |                                |                              |                             |                             |

|                                                                                                                                                                                                                                                                                                                                                                                                                                                                                                                                                                                                                                                                                                                                                                                                                                                                                                                 |            |            |            |            |
|-----------------------------------------------------------------------------------------------------------------------------------------------------------------------------------------------------------------------------------------------------------------------------------------------------------------------------------------------------------------------------------------------------------------------------------------------------------------------------------------------------------------------------------------------------------------------------------------------------------------------------------------------------------------------------------------------------------------------------------------------------------------------------------------------------------------------------------------------------------------------------------------------------------------|------------|------------|------------|------------|
| <p>(\$35,000/£21,000/€25,000) per patient. The drug does not cure the disease, but studies suggest that using the drug can add, on average, about six months to a patient's life. Some patients would gain only a short period, while others could gain a lot more time.</p> <p>If this decision not to (pay for/provide) this drug were made in [your country], would you approve or disapprove of the decision?</p>                                                                                                                                                                                                                                                                                                                                                                                                                                                                                           |            |            |            |            |
| Favor                                                                                                                                                                                                                                                                                                                                                                                                                                                                                                                                                                                                                                                                                                                                                                                                                                                                                                           | 36 (28-43) | 39 (32-47) | 24 (17-30) | 37 (32-43) |
| Oppose                                                                                                                                                                                                                                                                                                                                                                                                                                                                                                                                                                                                                                                                                                                                                                                                                                                                                                          | 60 (53-68) | 51 (44-59) | 76 (69-82) | 59 (54-65) |
| <p>In one country, two drugs were available to treat a debilitating condition in the elderly. One of the drugs costs about 100 times as much as the other. The more expensive one has been tested and shown to be effective for people with this condition. The less expensive one has not been tested in research studies for treating this illness. However, many physicians who specialize in the condition use the lower-cost drug because they believe it is safe and effective for their patients. This is often referred to as using an off-label drug. The government in that country decided to (pay for/provide/pay) only the less expensive drug even though it had not been tested for this illness.-If this decision only to (pay for/provide) the less expensive drug that had not been tested for this illness were made in [your country], would you approve or disapprove of the decision?</p> |            |            |            |            |
| Favor                                                                                                                                                                                                                                                                                                                                                                                                                                                                                                                                                                                                                                                                                                                                                                                                                                                                                                           | 24 (18-31) | 25 (18-31) | 20 (14-26) | 26 (21-31) |
| Oppose                                                                                                                                                                                                                                                                                                                                                                                                                                                                                                                                                                                                                                                                                                                                                                                                                                                                                                          | 70 (63-78) | 71 (64-80) | 80 (74-86) | 71 (66-76) |
| <p>A new drug is available for a serious, debilitating disease. It does not cure the disease, but it can provide relief for the symptoms of the disease. In one country, the national government decided to (pay for/provide) this drug only for a limited number of patients because of the drug's high cost of (\$15,000/£9,000/€11,000) a year. The drug is reserved for those patients who are most likely to see significant health</p>                                                                                                                                                                                                                                                                                                                                                                                                                                                                    |            |            |            |            |

|                                                                                                                                                                                                                                                                                                                                                                                                                                                                                                                                                                                                                                                                                                                                                                                                                                                                                                                                                                                                                                           |            |            |            |            |
|-------------------------------------------------------------------------------------------------------------------------------------------------------------------------------------------------------------------------------------------------------------------------------------------------------------------------------------------------------------------------------------------------------------------------------------------------------------------------------------------------------------------------------------------------------------------------------------------------------------------------------------------------------------------------------------------------------------------------------------------------------------------------------------------------------------------------------------------------------------------------------------------------------------------------------------------------------------------------------------------------------------------------------------------|------------|------------|------------|------------|
| benefits. Some people have objected to the decision because they argue that other patients might also benefit from the drug.-If this decision to (pay for/provide) this drug only for a limited number of patients were made in [your country], would you approve or disapprove of the decision?                                                                                                                                                                                                                                                                                                                                                                                                                                                                                                                                                                                                                                                                                                                                          |            |            |            |            |
| Favor                                                                                                                                                                                                                                                                                                                                                                                                                                                                                                                                                                                                                                                                                                                                                                                                                                                                                                                                                                                                                                     | 28 (21-35) | 26 (20-32) | 27 (20-34) | 28 (22-33) |
| Oppose                                                                                                                                                                                                                                                                                                                                                                                                                                                                                                                                                                                                                                                                                                                                                                                                                                                                                                                                                                                                                                    | 66 (58-73) | 71 (64-77) | 72 (65-79) | 69 (64-75) |
| In one country, the national government decided against (paying for/providing) the use of an imaging technology for diagnosing certain types of cancers. The technology is more expensive than alternative methods, costing over (\$2,000/£1,200/€1,400) per use. After conducting an evaluation, a government organization concluded that there was not enough scientific evidence to recommend using the technology for these other types of cancer. Other countries, however, actively use this technology for multiple types of cancer, because many doctors believe it provides the best, most detailed view of these other types of tumors. The evaluation organization argued that existing studies have not conclusively proven that the technology has advantages over alternative methods and therefore should not be (paid for/provided). If this decision not to (pay for/provide) this technology to help diagnose these other types of cancer were made in [your country], would you approve or disapprove of the decision? |            |            |            |            |
| Favor                                                                                                                                                                                                                                                                                                                                                                                                                                                                                                                                                                                                                                                                                                                                                                                                                                                                                                                                                                                                                                     | 26 (19-32) | 53 (46-60) | 18 (13-24) | 34 (28-39) |
| Oppose                                                                                                                                                                                                                                                                                                                                                                                                                                                                                                                                                                                                                                                                                                                                                                                                                                                                                                                                                                                                                                    | 67 (60-75) | 39 (32-47) | 78 (71-84) | 63 (57-68) |

Source: Harvard School of Public Health/Alliance for Aging Research Survey, 2011.

Note: "Don't know/Refused" responses not shown.

The survey asked people whether they would favor or oppose their country having a government decision-making body that

recommends whether government programs should pay for or provide prescription drugs/medical or surgical treatments if they think they cost too much. Public opinion in the four countries differs. Majorities in Germany (69%) and Italy (71%) favor having such an agency. A majority (54%) in the U.S. oppose having such an agency, while 43% favor having one. The public in the U.K. is about evenly divided, with 46% in favor, 48% opposed (Table 3).

Table 3. Public attitudes in four countries about government decision-making about costs of medical interventions (in percent)

|                                                                                                                                                                                                                                | Germany<br>n=500<br>% (CI 95%) | Italy<br>n=500<br>% (CI 95%) | U.K.<br>n=500<br>% (CI 95%) | U.S.<br>n=1017<br>% (CI 95%) |
|--------------------------------------------------------------------------------------------------------------------------------------------------------------------------------------------------------------------------------|--------------------------------|------------------------------|-----------------------------|------------------------------|
| Favor/oppose [your country] having a government decision-making body that recommends whether government programs should (pay for/provide) (prescription drugs/medical or surgical treatments) if they think they cost too much |                                |                              |                             |                              |
| Favor                                                                                                                                                                                                                          | 71 (66-76)                     | 69 (64-74)                   | 46 (40-51)                  | 43 (39-47)                   |
| Oppose                                                                                                                                                                                                                         | 21 (17-25)                     | 23 (18-27)                   | 48 (42-53)                  | 54 (50-58)                   |
| Such a government decision-making body would provide doctors with useful scientific information about what works best for patients with a given disease or medical condition                                                   |                                |                              |                             |                              |
| Yes                                                                                                                                                                                                                            | 64 (59-69)                     | 87 (84-90)                   | 67 (62-73)                  | 55 (51-59)                   |
| No                                                                                                                                                                                                                             | 27 (22-31)                     | 7 (5-9)                      | 27 (23-32)                  | 40 (36-43)                   |
| Trust the national government to make the right health care decisions                                                                                                                                                          |                                |                              |                             |                              |
| Trust                                                                                                                                                                                                                          | 42 (37-47)                     | 54 (49-59)                   | 54 (49-59)                  | 34 (30-38)                   |
| Do not trust                                                                                                                                                                                                                   | 53 (48-58)                     | 35 (30-40)                   | 39 (34-44)                  | 61 (57-65)                   |
| Don't know/Refused                                                                                                                                                                                                             | 5 (3-7)                        | 11 (8-14)                    | 7 (4-10)                    | 4 (3-5)                      |

Source: Harvard School of Public Health/Alliance for Aging Research Survey, 2011.

Note: "Don't know/Refused" responses not shown unless they are 10% or greater for the question in one or more countries.

1  
2  
3  
4  
5  
6  
7  
8  
9  
10  
11  
12  
13  
14  
15  
16  
17  
18  
19  
20  
21  
22  
23  
24  
25  
26  
27  
28  
29  
30  
31  
32  
33  
34  
35  
36  
37  
38  
39  
40  
41  
42  
43  
44  
45  
46  
47  
48  
49  
50  
51  
52  
53  
54  
55  
56  
57  
58  
59  
60

In spite of these differences in approval for a government decision-making body, majorities in all four countries believe that such an agency would provide doctors with useful scientific information about what works for patients with a given disease or medical condition.

With regard to governmental decision-making in health care, majorities in Italy and the U.K. say that they trust their national government to make the right health care decisions, while majorities in Germany and the U.S. say they do not.

## DISCUSSION

The survey findings indicate that the public distinguishes in practice between the concepts of comparative effectiveness and cost-benefit analysis. When two prescription drugs or treatments have the same outcome but one is more expensive than the other, the public supports policies that would not pay for or provide the more expensive one in the absence of evidence that it would work better than the less expensive alternative.

On the other hand, the survey found little public support, either in individual case examples or when asked in the aggregate, for the establishment of broader benefits as a criterion for whether or not a drug or treatment should be paid for or provided. If the evidence shows that a drug or treatment benefits some patients for some period of time, the public is



1  
2  
3  
4  
5  
6  
7  
8  
9 reluctant to have these medical interventions not paid for or  
10 provided.  
11

12 Taken together, this suggests that across the four  
13 countries public authorities engaged in decision-making  
14 activities will find much more public support if they are  
15 dealing with the first type of decision than with the second. In  
16 addition, public officials may face public resistance for  
17 decision-making about whether to pay for or provide high-cost  
18 medical interventions, because a large proportion of the public  
19 believes that some high-cost prescription drugs and treatments  
20 are already being withheld.  
21

22 This study has two main limitations. First, these types of  
23 policy-making decisions may be difficult for the general public  
24 to understand fully. Second, although respondents were told that  
25 these types of decisions were being made as a way of limiting  
26 future health care costs, they might have answered differently  
27 had they been told that these decisions might lower their taxes  
28 or health insurance premiums in the future, if that were the  
29 case.  
30

#### 31 **Author Contributions**

32 RJB and JMB made substantial contributions to the  
33 conception and design of the study, as well as the analysis and  
34 interpretation of the data, and drafted the article. MDB and MKK  
35

1  
2  
3  
4  
5  
6  
7  
8  
9 made substantial contributions to the conception and design of  
10 the study, the analysis and interpretation of the data, and the  
11 critical revision of the article. DZ made substantial  
12 contributions to the conception and design of the study, and to  
13 the critical revision of the article. All authors gave final  
14 approval of this version of the article. No one who fulfills the  
15 criteria for authorship has been excluded as an author.  
16  
17  
18  
19  
20  
21  
22  
23

#### 24 **Competing Interests**

25 All authors have completed the Unified Competing Interest  
26 form at [http://www.icmje.org/coi\\_disclosure.pdf](http://www.icmje.org/coi_disclosure.pdf) (available on  
27 request from the corresponding author). RJB, JMB, EMW, and KJW  
28 acted as subcontractors under an Alliance for Aging Research  
29 grant. DZ declares that the organisation by which she is  
30 employed, the Alliance for Aging Research, received a grant from  
31 Bayer AG for this survey.  
32  
33  
34  
35  
36  
37  
38  
39

#### 40 **Role of Funder**

41 The survey was supported by a grant to the Alliance for  
42 Aging Research from Bayer AG. Bayer was not involved in the  
43 design of the survey, the data collection, the analysis or the  
44 interpretation of findings, or the preparation of the  
45 manuscript. The authors had full access to all data in the study  
46  
47  
48  
49  
50  
51  
52  
53  
54  
55  
56  
57  
58  
59  
60

1  
2  
3  
4  
5  
6  
7  
8  
9 and had full responsibility for the decision to submit for  
10 publication.  
11

#### 12 13 14 **Licence to Publish**

15  
16 The Corresponding Author has the right to grant on behalf  
17 of all authors and does grant on behalf of all authors, an  
18 exclusive licence (or non exclusive for government employees) on  
19 a worldwide basis to the BMJ Publishing Group Ltd and its  
20 Licensees to permit this article (if accepted) to be published  
21 in BMJ editions and any other BMJPGJL products and sublicences to  
22 exploit all subsidiary rights, as set out in our licence.  
23  
24  
25  
26  
27  
28  
29

#### 30 31 **Data sharing**

32  
33 The topline results of the survey are publicly available at  
34 [http://www.hsph.harvard.edu/news/press-](http://www.hsph.harvard.edu/news/press-releases/files/blendon_topline_aging_12.11.pdf)  
35 [releases/files/blendon\\_topline\\_aging\\_12.11.pdf](http://www.hsph.harvard.edu/news/press-releases/files/blendon_topline_aging_12.11.pdf). Within six  
36 months, the dataset will be made available at a public opinion  
37 data archive.  
38  
39  
40  
41  
42

#### 43 44 **REFERENCES**

45  
46  
47  
48 1. European Observatory on Health Care Systems. Health care  
49 systems in transition: Germany. 2000.  
50

1  
2  
3  
4  
5  
6  
7  
8  
9  
10  
11  
12  
13  
14  
15  
16  
17  
18  
19  
20  
21  
22  
23  
24  
25  
26  
27  
28  
29  
30  
31  
32  
33  
34  
35  
36  
37  
38  
39  
40  
41  
42  
43  
44  
45  
46  
47  
48  
49  
50  
51  
52  
53  
54  
55  
56  
57  
58  
59  
60

[http://www.euro.who.int/\\_\\_data/assets/pdf\\_file/0010/80776/E68952](http://www.euro.who.int/__data/assets/pdf_file/0010/80776/E68952)

[.pdf](#) (accessed March 30<sup>th</sup>, 2012).

2. Jonsson B. IQWiG: an opportunity lost? *Eur J Health Econ* 2008;9(3):205-207.

3. Chalkidou K, Tunis S, Lopert R, et al. Comparative effectiveness research and evidence-based health policy: experience from four countries. *Millbank Q* 2009;87(2):339-367.

4. France G, Taroni F, Donatini A. The Italian health-care system. *Health Econ* 2005;14(Suppl 1):S187-202.

5. Macarthur D. Pharmaceutical pricing and reimbursement in the United Kingdom. *Health Economics in Prevention and Care* 2000;1(1):47-50.

6. Kamerow D. PCORI: odd name, important job, potential trouble. *BMJ* 2011;342:d2635. doi: 10.1136/bmj.d2635.

7. Iglehart JK. The political fight over comparative effectiveness research. *Health Aff (Millwood)* 2010;29(10):1757-1760.

1  
2  
3  
4  
5  
6  
7  
8  
9 8. Gerber AS, Patashnik EM, Doherty D, et al. The public wants  
10 information, not board mandates, from comparative effectiveness  
11 research. *Health Aff (Millwood)* 2010;29(10):1872-1881.  
12  
13

14  
15  
16 9. Busse R. Priority-setting and rationing in German health  
17 care. *Health Policy* 1999;50 (1-2):71-90.  
18  
19

20  
21  
22 10. Fattore G. Clarifying the scope of Italian NHS coverage. is  
23 it feasible? is it desirable? *Health Policy* 1999;50(1-2):123-  
24 142.  
25  
26

27  
28  
29 11. Diederich A, Winkelhage J, Wirsik N. Age as a criterion for  
30 setting priorities in health care? a survey of the German public  
31 view. *PLoS One* 2011;6(8):e23930.  
32  
33

34 [http://www.plosone.org/article/info%3Adoi%2F10.1371%2Fjournal.po](http://www.plosone.org/article/info%3Adoi%2F10.1371%2Fjournal.pone.0023930)  
35 [ne.0023930](http://www.plosone.org/article/info%3Adoi%2F10.1371%2Fjournal.pone.0023930) (accessed March 30, 2012).  
36  
37

38  
39  
40 129. Smith R. Bowel cancer drug Avastin turned down by NICE. *The*  
41 *Telegram*. August 24, 2010.  
42

43 [http://www.telegraph.co.uk/health/healthnews/7959762/Bowel-](http://www.telegraph.co.uk/health/healthnews/7959762/Bowel-cancer-drug-Avastin-turned-down-by-Nice.html)  
44 [cancer-drug-Avastin-turned-down-by-Nice.html](http://www.telegraph.co.uk/health/healthnews/7959762/Bowel-cancer-drug-Avastin-turned-down-by-Nice.html) (accessed March  
45  
46

47 309, 2012).  
48  
49  
50  
51  
52  
53  
54  
55  
56  
57  
58  
59  
60

1  
2  
3  
4  
5  
6  
7  
8  
9  
10  
11  
12  
13  
14  
15  
16  
17  
18  
19  
20  
21  
22  
23  
24  
25  
26  
27  
28  
29  
30  
31  
32  
33  
34  
35  
36  
37  
38  
39  
40  
41  
42  
43  
44  
45  
46  
47  
48  
49  
50  
51  
52  
53  
54  
55  
56  
57  
58  
59  
60

130. Pavlou F. Avastin to be reimbursed by Italian authorities.  
*Ophthalmology Times Europe*. July 1, 2007.

<http://www.oteurope.com/ophthalmologytimeseurope/content/printContentPopup.jsp?id=476054> (accessed March 309, 2012).

141. Kernick D. Beta interferon, NICE, and rationing. *Br J Gen Pract* 2002;52(482):784-785.

152. Institute for Quality and Efficiency in Health Care.  
Benefit of positron emission tomography (PET) in patients with  
head and neck tumors cannot be assessed. April 27, 2011.  
<https://www.iqwig.de/benefit-of-positron-emission-tomography-pet-in.1287.en.html> (accessed March 309, 2012).

STROBE 2007 (v4) Statement—Checklist of items that should be included in reports of *cross-sectional studies*

| Section/Topic                | Item # | Recommendation                                                                                                                                                                       | Reported on page # |
|------------------------------|--------|--------------------------------------------------------------------------------------------------------------------------------------------------------------------------------------|--------------------|
| Title and abstract           | 1      | (a) Indicate the study's design with a commonly used term in the title or the abstract                                                                                               | 1                  |
|                              |        | (b) Provide in the abstract an informative and balanced summary of what was done and what was found                                                                                  | 2-3                |
| <b>Introduction</b>          |        |                                                                                                                                                                                      |                    |
| Background/rationale         | 2      | Explain the scientific background and rationale for the investigation being reported                                                                                                 | 6-8                |
| Objectives                   | 3      | State specific objectives, including any prespecified hypotheses                                                                                                                     | 8-9                |
| <b>Methods</b>               |        |                                                                                                                                                                                      |                    |
| Study design                 | 4      | Present key elements of study design early in the paper                                                                                                                              | 9-11               |
| Setting                      | 5      | Describe the setting, locations, and relevant dates, including periods of recruitment, exposure, follow-up, and data collection                                                      | 9-10               |
| Participants                 | 6      | (a) Give the eligibility criteria, and the sources and methods of selection of participants                                                                                          | 9-10               |
| Variables                    | 7      | Clearly define all outcomes, exposures, predictors, potential confounders, and effect modifiers. Give diagnostic criteria, if applicable                                             | 10-12              |
| Data sources/<br>measurement | 8*     | For each variable of interest, give sources of data and details of methods of assessment (measurement). Describe comparability of assessment methods if there is more than one group | 9-10               |
| Bias                         | 9      | Describe any efforts to address potential sources of bias                                                                                                                            | 10                 |
| Study size                   | 10     | Explain how the study size was arrived at                                                                                                                                            | 9                  |
| Quantitative variables       | 11     | Explain how quantitative variables were handled in the analyses. If applicable, describe which groupings were chosen and why                                                         | 12                 |
| Statistical methods          | 12     | (a) Describe all statistical methods, including those used to control for confounding                                                                                                | 12                 |
|                              |        | (b) Describe any methods used to examine subgroups and interactions                                                                                                                  | Not applicable     |
|                              |        | (c) Explain how missing data were addressed                                                                                                                                          | 12                 |
|                              |        | (d) If applicable, describe analytical methods taking account of sampling strategy                                                                                                   | Not applicable     |
|                              |        | (e) Describe any sensitivity analyses                                                                                                                                                | Not applicable     |
| <b>Results</b>               |        |                                                                                                                                                                                      |                    |

|                          |     |                                                                                                                                                                                                              |                |
|--------------------------|-----|--------------------------------------------------------------------------------------------------------------------------------------------------------------------------------------------------------------|----------------|
| Participants             | 13* | (a) Report numbers of individuals at each stage of study—eg numbers potentially eligible, examined for eligibility, confirmed eligible, included in the study, completing follow-up, and analysed            | 9-10           |
|                          |     | (b) Give reasons for non-participation at each stage                                                                                                                                                         | 10             |
|                          |     | (c) Consider use of a flow diagram                                                                                                                                                                           | Not applicable |
| Descriptive data         | 14* | (a) Give characteristics of study participants (eg demographic, clinical, social) and information on exposures and potential confounders                                                                     | 10             |
|                          |     | (b) Indicate number of participants with missing data for each variable of interest                                                                                                                          | 12             |
| Outcome data             | 15* | Report numbers of outcome events or summary measures                                                                                                                                                         | 12-19          |
| Main results             | 16  | (a) Give unadjusted estimates and, if applicable, confounder-adjusted estimates and their precision (eg, 95% confidence interval). Make clear which confounders were adjusted for and why they were included | 12-19          |
|                          |     | (b) Report category boundaries when continuous variables were categorized                                                                                                                                    | Not applicable |
|                          |     | (c) If relevant, consider translating estimates of relative risk into absolute risk for a meaningful time period                                                                                             | Not applicable |
| Other analyses           | 17  | Report other analyses done—eg analyses of subgroups and interactions, and sensitivity analyses                                                                                                               | Not applicable |
| <b>Discussion</b>        |     |                                                                                                                                                                                                              |                |
| Key results              | 18  | Summarise key results with reference to study objectives                                                                                                                                                     | 19-21          |
| Limitations              | 19  | Discuss limitations of the study, taking into account sources of potential bias or imprecision. Discuss both direction and magnitude of any potential bias                                                   | 20             |
| Interpretation           | 20  | Give a cautious overall interpretation of results considering objectives, limitations, multiplicity of analyses, results from similar studies, and other relevant evidence                                   | 19-21          |
| Generalisability         | 21  | Discuss the generalisability (external validity) of the study results                                                                                                                                        | 10             |
| <b>Other information</b> |     |                                                                                                                                                                                                              |                |
| Funding                  | 22  | Give the source of funding and the role of the funders for the present study and, if applicable, for the original study on which the present article is based                                                | 21-22          |

\*Give information separately for cases and controls in case-control studies and, if applicable, for exposed and unexposed groups in cohort and cross-sectional studies.

**Note:** An Explanation and Elaboration article discusses each checklist item and gives methodological background and published examples of transparent reporting. The STROBE checklist is best used in conjunction with this article (freely available on the Web sites of PLoS Medicine at <http://www.plosmedicine.org/>, Annals of Internal Medicine at <http://www.annals.org/>, and Epidemiology at <http://www.epidem.com/>). Information on the STROBE Initiative is available at [www.strobe-statement.org](http://www.strobe-statement.org).



To view the full contents of this document, you need a later version of the PDF viewer. You can upgrade to the latest version of Adobe Reader from [www.adobe.com/products/acrobat/readstep2.html](http://www.adobe.com/products/acrobat/readstep2.html)

For further support, go to [www.adobe.com/support/products/acrreader.html](http://www.adobe.com/support/products/acrreader.html)

To view the full contents of this document, you need a later version of the PDF viewer. You can upgrade to the latest version of Adobe Reader from [www.adobe.com/products/acrobat/readstep2.html](http://www.adobe.com/products/acrobat/readstep2.html)

For further support, go to [www.adobe.com/support/products/acrreader.html](http://www.adobe.com/support/products/acrreader.html)

To view the full contents of this document, you need a later version of the PDF viewer. You can upgrade to the latest version of Adobe Reader from [www.adobe.com/products/acrobat/readstep2.html](http://www.adobe.com/products/acrobat/readstep2.html)

For further support, go to [www.adobe.com/support/products/acrreader.html](http://www.adobe.com/support/products/acrreader.html)

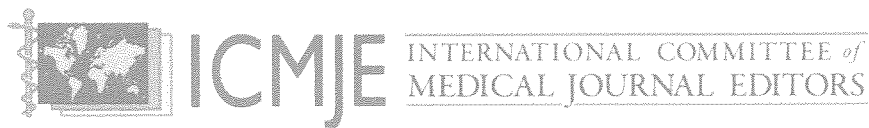

## ICMJE Form for Disclosure of Potential Conflicts of Interest

### Instructions

The purpose of this form is to provide readers of your manuscript with information about your other interests that could influence how they receive and understand your work. The form is designed to be completed electronically and stored electronically. It contains programming that allows appropriate data display. Each author should submit a separate form and is responsible for the accuracy and completeness of the submitted information. The form is in four parts.

#### 1. Identifying information.

Enter your full name. If you are NOT the corresponding author please check the box "no" and a space to enter the name of the corresponding author in the space that appears. Provide the requested manuscript information. Double-check the manuscript number and enter it.

#### 2. The work under consideration for publication.

This section asks for information about the work that you have submitted for publication. The time frame for this reporting is that of the work itself, from the initial conception and planning to the present. The requested information is about resources that you received, either directly or indirectly (via your institution), to enable you to complete the work. Checking "No" means that you did the work without receiving any financial support from any third party -- that is, the work was supported by funds from the same institution that pays your salary and that institution did not receive third-party funds with which to pay you. If you or your institution received funds from a third party to support the work, such as a government granting agency, charitable foundation or commercial sponsor, check "Yes". Then complete the appropriate boxes to indicate the type of support and whether the payment went to you, or to your institution, or both.

#### 3. Relevant financial activities outside the submitted work.

This section asks about your financial relationships with entities in the bio-medical arena that could be perceived to influence, or that give the appearance of potentially influencing, what you wrote in the submitted work. You should disclose interactions with ANY entity that could be considered broadly relevant to the work. For example, if your article is about testing an epidermal growth factor receptor (EGFR) antagonist in lung cancer, you should report all associations with entities pursuing diagnostic or therapeutic strategies in cancer in general, not just in the area of EGFR or lung cancer.

Report all sources of revenue paid (or promised to be paid) directly to you or your institution on your behalf over the 36 months prior to submission of the work. This should include all monies from sources with relevance to the submitted work, not just monies from the entity that sponsored the research. Please note that your interactions with the work's sponsor that are outside the submitted work should also be listed here. If there is any question, it is usually better to disclose a relationship than not to do so.

For grants you have received for work outside the submitted work, you should disclose support ONLY from entities that could be perceived to be affected financially by the published work, such as drug companies, or foundations supported by entities that could be perceived to have a financial stake in the outcome. Public funding sources, such as government agencies, charitable foundations or academic institutions, need not be disclosed. For example, if a government agency sponsored a study in which you have been involved and drugs were provided by a pharmaceutical company, you need only list the pharmaceutical company.

#### 4. Other relationships.

Use this section to report other relationships or activities that readers could perceive to have influenced, or that give the appearance of potentially influencing, what you wrote in the submitted work.



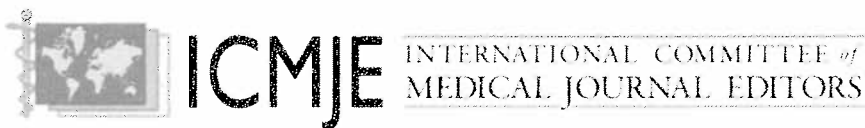

## ICMJE Form for Disclosure of Potential Conflicts of Interest

### The Work Under Consideration for Publication

| Type     | No                                  | Money Paid to You        | Money to Your Institution* | Name of Entity | Comments** |                   |
|----------|-------------------------------------|--------------------------|----------------------------|----------------|------------|-------------------|
| 7. Other | <input checked="" type="checkbox"/> | <input type="checkbox"/> | <input type="checkbox"/>   |                |            | ADD<br>X<br>Add's |

\* This means money that your institution received for your efforts on this study.

\*\* Use this section to provide any needed explanation.

### Section 3. Relevant financial activities outside the submitted work.

Place a check in the appropriate boxes in the table to indicate whether you have financial relationships (regardless of amount of compensation) with entities as described in the instructions. Use one line for each entity; add as many lines as you need by clicking the "Add +" box. You should report relationships that were present during the 36 months prior to submission.

Complete each row by checking "No" or providing the requested information. If you have more than one relationship click the "Add" button to add a row. Excess rows can be removed by clicking the "X" button.

### Relevant financial activities outside the submitted work

| Type of Relationship (in alphabetical order)                  | No                                  | Money Paid to You        | Money to Your Institution*          | Entity | Comments |          |
|---------------------------------------------------------------|-------------------------------------|--------------------------|-------------------------------------|--------|----------|----------|
| 1. Board membership                                           | <input checked="" type="checkbox"/> | <input type="checkbox"/> | <input type="checkbox"/>            |        |          | X<br>ADD |
| 2. Consultancy                                                | <input checked="" type="checkbox"/> | <input type="checkbox"/> | <input type="checkbox"/>            |        |          | X<br>ADD |
| 3. Employment                                                 | <input checked="" type="checkbox"/> | <input type="checkbox"/> | <input type="checkbox"/>            |        |          | X<br>ADD |
| 4. Expert testimony                                           | <input checked="" type="checkbox"/> | <input type="checkbox"/> | <input type="checkbox"/>            |        |          | X<br>ADD |
| 5. Grants/grants pending                                      | <input type="checkbox"/>            | <input type="checkbox"/> | <input checked="" type="checkbox"/> |        |          | X<br>ADD |
| 6. Payment for lectures including service on speakers bureaus | <input checked="" type="checkbox"/> | <input type="checkbox"/> | <input type="checkbox"/>            |        |          | X<br>ADD |
| 7. Payment for manuscript preparation                         | <input checked="" type="checkbox"/> | <input type="checkbox"/> | <input type="checkbox"/>            |        |          | X        |

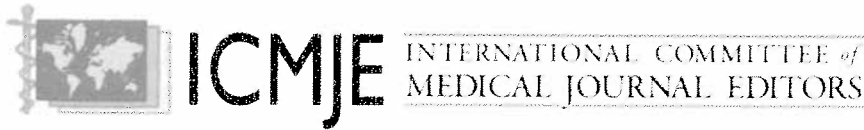

## ICMJE Form for Disclosure of Potential Conflicts of Interest

| Relevant financial activities outside the submitted work                    |                                     |                          |                            |        |          |     |
|-----------------------------------------------------------------------------|-------------------------------------|--------------------------|----------------------------|--------|----------|-----|
| Type of Relationship (in alphabetical order)                                | No                                  | Money Paid to You        | Money to Your Institution* | Entity | Comments |     |
| 8. Patents (planned, pending or issued)                                     | <input checked="" type="checkbox"/> | <input type="checkbox"/> | <input type="checkbox"/>   |        |          | ADD |
|                                                                             |                                     |                          |                            |        |          | X   |
| 9. Royalties                                                                | <input checked="" type="checkbox"/> | <input type="checkbox"/> | <input type="checkbox"/>   |        |          | ADD |
|                                                                             |                                     |                          |                            |        |          | X   |
| 10. Payment for development of educational presentations                    | <input checked="" type="checkbox"/> | <input type="checkbox"/> | <input type="checkbox"/>   |        |          | ADD |
|                                                                             |                                     |                          |                            |        |          | X   |
| 11. Stock/stock options                                                     | <input checked="" type="checkbox"/> | <input type="checkbox"/> | <input type="checkbox"/>   |        |          | ADD |
|                                                                             |                                     |                          |                            |        |          | X   |
| 12. Travel/accommodations/meeting expenses unrelated to activities listed** | <input checked="" type="checkbox"/> | <input type="checkbox"/> | <input type="checkbox"/>   |        |          | ADD |
|                                                                             |                                     |                          |                            |        |          | X   |
| 13. Other (err on the side of full disclosure)                              | <input checked="" type="checkbox"/> | <input type="checkbox"/> | <input type="checkbox"/>   |        |          | ADD |
|                                                                             |                                     |                          |                            |        |          | X   |
|                                                                             |                                     |                          |                            |        |          | ADD |

\* This means money that your institution received for your efforts.

\*\* For example, if you report a consultancy above there is no need to report travel related to that consultancy on this line.

### Section 4. Other relationships

Are there other relationships or activities that readers could perceive to have influenced, or that give the appearance of potentially influencing, what you wrote in the submitted work?

- No other relationships/conditions/circumstances that present a potential conflict of interest
- Yes, the following relationships/conditions/circumstances are present (explain below):

At the time of manuscript acceptance, journals will ask authors to confirm and, if necessary, update their disclosure statements. On occasion, journals may ask authors to disclose further information about reported relationships.

Hide All Table Rows Checked 'No'

SAVE

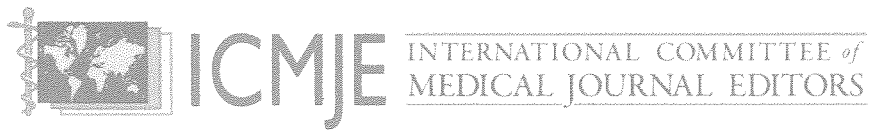

1  
2  
3  
4  
5  
6  
7  
8  
9  
10  
11  
12  
13  
14  
15  
16  
17  
18  
19  
20  
21  
22  
23  
24  
25  
26  
27  
28  
29  
30  
31  
32  
33  
34  
35  
36  
37  
38  
39  
40  
41  
42  
43  
44  
45  
46  
47  
48  
49  
50  
51  
52  
53  
54  
55  
56  
57  
58  
59  
60

## ICMJE Form for Disclosure of Potential Conflicts of Interest

---

### Evaluation and Feedback

Please visit <http://www.icmje.org/cgi-bin/feedback> to provide feedback on your experience with completing this form.



To view the full contents of this document, you need a later version of the PDF viewer. You can upgrade to the latest version of Adobe Reader from [www.adobe.com/products/acrobat/readstep2.html](http://www.adobe.com/products/acrobat/readstep2.html)

For further support, go to [www.adobe.com/support/products/acrreader.html](http://www.adobe.com/support/products/acrreader.html)
